1 Comparative analysis of amplicon and metagenomic sequencing methods reveals key features  
2 in the evolution of animal metaorganisms

3 Philipp Rausch<sup>1,2,3,&,\*</sup>, Malte Rühlemann<sup>4,&</sup>, Britt Hermes<sup>1,2,5</sup>, Shauni Doms<sup>1,2</sup>, Tal Dagan<sup>6</sup>, Katja  
4 Dierking<sup>7</sup>, Hanna Domin<sup>8</sup>, Sebastian Fraune<sup>8</sup>, Jakob von Frieling<sup>9</sup>, Ute Henschel Humeida<sup>10,11</sup>,  
5 Femke-Anouska Heinsen<sup>4</sup>, Marc Höppner<sup>4</sup>, Martin Jahn<sup>10,11</sup>, Cornelia Jaspers<sup>11,12</sup>, Kohar Annie  
6 B. Kissoyan<sup>7</sup>, Daniela Langfeldt<sup>6</sup>, Ateeqr Rehman<sup>4</sup>, Thorsten B. H. Reusch<sup>11,12</sup>, Thomas Röder<sup>9</sup>,  
7 Ruth A. Schmitz<sup>6</sup>, Hinrich Schulenburg<sup>7</sup>, Ryszard Soluch<sup>6</sup>, Felix Sommer<sup>4</sup>, Eva Stukenbrock<sup>13,14</sup>,  
8 Nancy Weiland-Bräuer<sup>6</sup>, Philip Rosenstiel<sup>4</sup>, Andre Franke<sup>4</sup>, Thomas Bosch<sup>8</sup>, John F. Baines<sup>1,2,\*</sup>

9 Affiliations:

10 <sup>1</sup> Evolutionary Genomics, Max Planck Institute for Evolutionary Biology, Plön, Germany

11 <sup>2</sup> Institute for Experimental Medicine, Kiel University, Kiel, Germany

12 <sup>3</sup> Laboratory of Genomics and Molecular Biomedicine, Department of Biology University of  
13 Copenhagen, Copenhagen Ø, Denmark

14 <sup>4</sup> Institute of Clinical Molecular Biology, Kiel University, Kiel, Germany

15 <sup>5</sup> Lübeck Institute of Experimental Dermatology, University of Lübeck, Germany

16 <sup>6</sup> Institute of General Microbiology, Kiel University, Kiel, Germany

17 <sup>7</sup> Department of Evolutionary Ecology and Genetics, Zoological Institute, Kiel University, Kiel,  
18 Germany

19 <sup>8</sup> Zoological Institute, Kiel University, Kiel, Germany

20 <sup>9</sup> Molecular Physiology, Zoological Institute, Kiel University, Kiel, Germany

21 <sup>10</sup> Marine Ecology, Research Unit Marine Microbiology, GEOMAR Helmholtz Centre for Ocean  
22 Research, Kiel, Germany

23 <sup>11</sup> Kiel University, Kiel, Germany

24 <sup>12</sup> Marine Ecology, GEOMAR Helmholtz Centre for Ocean Research, Kiel, Germany

25 <sup>13</sup> Environmental Genomics, Max Planck Institute for Evolutionary Biology, Plön, Germany

26 <sup>14</sup> Environmental Genomics, Botanical Institute, Kiel University, Kiel, Germany

27 & Authors contributed equally

28 \* Corresponding authors: Philipp Rausch ([philipp.rausch@bio.ku.dk](mailto:philipp.rausch@bio.ku.dk)), John F. Baines  
29 ([baines@evolbio.mpg.de](mailto:baines@evolbio.mpg.de))

30 Email addresses: John F. Baines- [baines@evolbio.mpg.de](mailto:baines@evolbio.mpg.de), Thomas Bosch-  
31 [tbosch@zoologie.uni-kiel.de](mailto:tbosch@zoologie.uni-kiel.de), Tal Dagan- [tdagan@ifam.uni-kiel.de](mailto:tdagan@ifam.uni-kiel.de), Katja Dierking-  
32 [kdierking@zoologie.uni-kiel.de](mailto:kdierking@zoologie.uni-kiel.de), Hanna Domin- [hdomin@zoologie.uni-kiel.de](mailto:hdomin@zoologie.uni-kiel.de), Shauni Doms-  
33 [doms@evolbio.mpg.de](mailto:doms@evolbio.mpg.de), Andre Franke- [a.franke@mucosa.de](mailto:a.franke@mucosa.de), Sebastian Fraune-  
34 [sfraune@zoologie.uni-kiel.de](mailto:sfraune@zoologie.uni-kiel.de), Jakob von Frieling- [jfrieling@zoologie.uni-kiel.de](mailto:jfrieling@zoologie.uni-kiel.de), Femke-  
35 Anouska Heinsen- [f.heinsen@ikmb.uni-kiel.de](mailto:f.heinsen@ikmb.uni-kiel.de), Ute Henschel Humeida-  
36 [uhentschel@geomar.de](mailto:uhentschel@geomar.de), Britt Marie Hermes- [hermes@evolbio.mpg.de](mailto:hermes@evolbio.mpg.de), Marc Höppner-  
37 [m.hoepfner@ikmb.uni-kiel.de](mailto:m.hoepfner@ikmb.uni-kiel.de), Martin Jahn- [mjahn@geomar.de](mailto:mjahn@geomar.de), Cornelia Jaspers-  
38 [cjaspers@geomar.de](mailto:cjaspers@geomar.de), Kohar Annie B. Kissoyan- [kkissoyan@zoologie.uni-kiel.de](mailto:kkissoyan@zoologie.uni-kiel.de), Daniela  
39 Langfeldt- [dlangfeldt@ifam.uni-kiel.de](mailto:dlangfeldt@ifam.uni-kiel.de), Philipp Rausch- [philipp.rausch@bio.ku.dk](mailto:philipp.rausch@bio.ku.dk), Ateeqr  
40 Rehman- [a.rehmann@mucosa.de](mailto:a.rehmann@mucosa.de), Thorsten B. H. Reusch- [treusch@geomar.de](mailto:treusch@geomar.de), Thomas  
41 Röder- [troeder@zoologie.uni-kiel.de](mailto:troeder@zoologie.uni-kiel.de), Philip Rosenstiel- [p.rosenstiel@mucosa.de](mailto:p.rosenstiel@mucosa.de), Malte  
42 Rühlemann- [m.ruehlemann@ikmb.uni-kiel.de](mailto:m.ruehlemann@ikmb.uni-kiel.de), Ruth A. Schmitz- [rschmitz@ifam.uni-kiel.de](mailto:rschmitz@ifam.uni-kiel.de),  
43 Hinrich Schulenburg- [hschulenburg@zoologie.uni-kiel.de](mailto:hschulenburg@zoologie.uni-kiel.de), Ryszard Soluch- [rsoluch@ifam.uni-kiel.de](mailto:rsoluch@ifam.uni-kiel.de),  
44 Felix Sommer- [f.sommer@ikmb.uni-kiel.de](mailto:f.sommer@ikmb.uni-kiel.de), Eva Stukenbrock- [estukenbrock@bot.uni-kiel.de](mailto:estukenbrock@bot.uni-kiel.de),  
45 Nancy Weiland-Bräuer- [nweiland@ifam.uni-kiel.de](mailto:nweiland@ifam.uni-kiel.de)

46

47 **Abstract**

48 **Background:** The interplay between hosts and their associated microbiome is now recognized  
49 as a fundamental basis of the ecology, evolution and development of both players. These  
50 interdependencies inspired a new view of multicellular organisms as “metaorganisms”. The goal  
51 of the Collaborative Research Center “Origin and Function of Metaorganisms” is to understand  
52 why and how microbial communities form long-term associations with hosts from diverse  
53 taxonomic groups, ranging from sponges to humans in addition to plants.

54 **Methods:** In order to optimize the choice of analysis procedures, which may differ according to  
55 the host organism and question at hand, we systematically compared the two main technical  
56 approaches for profiling microbial communities, 16S rRNA gene amplicon- and metagenomic  
57 shotgun sequencing across our panel of ten host taxa. This includes two commonly used 16S  
58 rRNA gene regions and two amplification procedures, thus totaling five different microbial  
59 profiles per host sample.

60 **Conclusion:** While 16S rRNA gene-based analyses are subject to much skepticism, we  
61 demonstrate that many aspects of bacterial community characterization are consistent across  
62 methods and that metagenomic shotgun results are largely dependent on the employed pipeline.  
63 The resulting insight facilitates the selection of appropriate methods across a wide range of host  
64 taxa. Finally, by contrasting taxonomic and functional profiles and performing phylogenetic  
65 analysis, we provide important and novel insight into broad evolutionary patterns among  
66 metaorganisms, whereby the transition of animals from an aquatic to a terrestrial habitat marks a  
67 major event in the evolution of host-associated microbial composition.

68

69 **Keywords:** animal microbiome; evolution; phyllosymbiosis; holobiont; metaorganism

70

71 **Background**

72 Dynamic host-microbe interactions have shaped the evolution of life. Virtually all plants and  
73 animals are colonized by an interdependent complex of microorganisms, and there is growing  
74 recognition that the biological processes of hosts and their associated microbial communities  
75 function in tandem, often as biological partners comprising a collective entity known as the  
76 metaorganism [1]. For instance, symbiotic bacteria contribute to host health and development in  
77 critical ways, ranging from nutrient metabolism to regulating whole life cycles [2] and in turn

78 benefit from habitats and resources the host provides. Moreover, it is well established that  
79 perturbations of the microbiome likely play an important role in many host disease states [3].  
80 However, researchers have yet to elucidate the mechanisms driving these interactions, as the  
81 exact molecular and cellular processes are only poorly understood.

82 An integrated view on the metaorganism encompasses a cross-disciplinary approach  
83 that addresses how and why microbial communities form long-term associations with their hosts.  
84 Despite widespread agreement that the interdependencies of microbes and their hosts warrant  
85 elucidation, there remains considerable incongruity between researchers regarding the best  
86 methodologies to study host-microbe interactions. The development of standardized protocols  
87 for characterizing and analyzing host-associated microbiomes across the breadth of the tree of  
88 life are thus crucial to understand the evolution and function of metaorganisms without the  
89 issues of technical inconsistencies or data quality.

90 Rapidly growing interest in microbiome research has been bolstered by the ability to  
91 profile diverse microbial communities using next-generation sequencing (NGS). This culture-  
92 free, high-throughput technology enables identification and comparison of entire microbial  
93 communities [4]. Metagenomics typically encompasses two particular sequencing strategies:  
94 amplicon sequencing, most often of the 16S rRNA gene as a phylogenetic marker, or shotgun  
95 sequencing, which captures the complete breadth of DNA within a sample [4].

96 The use of the 16S ribosomal RNA gene as a phylogenetic marker has proven to be an  
97 efficient and cost-effective strategy for microbiome analysis, and even allows for the imputation  
98 of functional content based on taxon abundances [5]. However, PCR-based phylogenetic marker  
99 protocols are vulnerable to biases through sample preparation and sequencing errors, in  
100 particular the choice of which hypervariable regions of the 16S rRNA gene targeted seem to be  
101 among the biggest factors underlying technical differences in microbiome composition [6-8].  
102 Furthermore, 16S rRNA gene amplicon sequencing is typically limited to taxonomic classification  
103 at the genus-level depending on the database and classifiers used [9], and provides only limited  
104 functional information [5]. These well-recognized limitations of amplicon-based microbial  
105 community analyses have raised concerns about the accuracy and reproducibility of 16S rRNA  
106 phylogenetic marker studies and have led to an increased interest in developing more reliable  
107 methods for amplicon library preparation and sequencing [8, 10].

108 Shotgun metagenomics, on the other hand, offers the advantage of species- and strain-  
109 level classification of bacteria. Additionally, it allows researchers to examine the functional  
110 relationships between hosts and bacteria by determining the functional content of samples

111 directly [9, 11], and enables the exploration of yet unknown microbial life that would otherwise  
112 remain unclassifiable [12]. However, the relatively high costs of shotgun metagenomics and  
113 more demanding bioinformatic requirements have precluded its use for microbiome analysis on  
114 a wide scale [4, 9].

115 In this study, we set out to systematically compare experimental and analytical aspects of  
116 the two main technical approaches for profiling microbial communities, 16S rRNA gene  
117 amplicon- and shotgun sequencing, across a diverse array of host species studied in the  
118 Collaborative Research Center 1182, “Origin and Function of Metaorganisms”. The ten host  
119 species range from basal aquatic metazoans [*Aplysina aerophoba* (sponge) and *Mnemiopsis*  
120 *leidy* (comb jelly)], to marine and limnic cnidarians (*Aurelia aurita*, *Nematostella vectensis*,  
121 *Hydra vulgaris*), standard vertebrate (*Mus musculus*) and invertebrate model organisms  
122 (*Drosophila melanogaster*, *Caenorhabditis elegans*), to *Homo sapiens*, in addition to wheat  
123 (*Triticum aestivum*) and a standardized mock community. This setup provides a breadth of  
124 samples in terms of taxonomic composition and diversity. Conducting standardized data  
125 generation procedures on these diverse samples on the one hand provides a unique and  
126 powerful opportunity to systematically compare alternative methods, which display considerable  
127 heterogeneity in performance. On the other hand, this information enables researchers working  
128 on these or similar host species to choose the experimental (e.g. hypervariable region) or  
129 analytical pipelines that best suit their needs, which will be a valuable resource to the greater  
130 community of host-microbe researchers. Finally, we identified a number of interesting, broad  
131 scale patterns contrasting the aquatic and terrestrial environment of metaorganisms, which also  
132 reflect their evolutionary trajectories.

133

## 134 **Results**

135 Our panel of hosts includes ten species, for which five biological replicates each were included  
136 (see Figure S1). The majority of hosts are metazoans, including the “gold sponge” (*Aplysina*  
137 *aerophoba*), moon jellyfish (*Aurelia aurita*), comb jellyfish (*Mnemiopsis leidy*), starlet sea  
138 anemone (*Nematostella vectensis*), fresh-water polyp *Hydra vulgaris*, roundworm  
139 (*Caenorhabditis elegans*), fruit fly (*Drosophila melanogaster*), mouse (*Mus musculus*), human  
140 (*Homo sapiens*), as well as the inclusion of wheat (*Triticum aestivum*), which can serve as an  
141 outgroup to the metazoan taxa. *Drosophila melanogaster* was additionally sampled using two  
142 different methods targeting feces and intestinal tissue. Nucleic acid extraction procedures were  
143 conducted according to the needs of the individual host species (see Methods and

144 Supplementary Material), after which all DNA templates were subjected to a standard panel of  
145 sequencing procedures. For 16S rRNA gene amplicon sequencing we used primers flanking two  
146 commonly used variable regions, the V1V2 and V3V4 regions. Further, for each region we  
147 compared a single-step fusion-primer PCR to a two-step procedure designed to improve the  
148 accuracy of amplicon-based studies [8]. Finally, all samples were also subjected to shotgun  
149 sequencing, such that five different sequence profiles were generated for each sample. While a  
150 single classification pipeline was employed for all four 16S rRNA gene amplicon sequence  
151 profiles, community composition based on shotgun data was initially evaluated using five  
152 different classification methods (Kraken [13], MEGAN [14], MetaPhlan [15], MetaPhlan2 [16],  
153 and SortmeRNA [17]; see Supplementary Material for comparative descriptions). However, due  
154 to the advantage of simultaneously performing taxonomical and functional classification of  
155 shotgun reads, as well as overall good performance (see analyses of mock community below),  
156 MEGAN was used as a representative pipeline for most subsequent analyses.

157 **Performance of data processing and quality control:** All data generated from amplicons were  
158 subject to the same stringent quality control pipeline including read-trimming, merging of forward  
159 and reverse reads, quality filtering based on sequence quality and estimated errors, and chimera  
160 removal (see Methods). The one step V1V2 amplicon data showed the highest rate of read-  
161 survival ( $62.13 \pm 23.90\%$ , mean  $\pm$  s.d.) followed by the corresponding two step method (mean=  
162  $49.85 \pm 23.90\%$ , mean  $\pm$  s.d.), in large part due to the greater coverage of this comparatively  
163 shorter amplicon (~312 bp). In contrast,  $42.02 \pm 16.41\%$  and  $36.88 \pm 23.89\%$  of the total reads  
164 were included in downstream analysis for the one step and two step V3V4 data, respectively.  
165 The longer V3V4 amplicon (~470 bp) was more affected by drops in quality at the end of the  
166 reads, which decreases the overlap of forward and reverse reads and thus increases the  
167 chances of sequencing errors (Figure S2, for final sample sizes see Table S1). Overall, aside  
168 from chimera removal, each quality control step resulted in a comparatively greater loss of  
169 V3V4- compared to V1V2 data. On the other hand, the V3V4 one step method yields the lowest  
170 number of chimeras, suggesting a lower rate of chimera formation- and/or detection in this  
171 approach (variable region-  $F_{1,214}=3.8881$ ,  $P=0.0499$ , PCR-  $F_{1,214}=8.1751$ ,  $P=0.0047$ , variable  
172 region $\times$ PCR-  $F_{1,214}=6.4733$ ,  $P=0.0117$ ; Linear Mixed Model with organism as random factor).  
173 Among all host taxa we observe the highest proportion of retained reads in the V1V2 one step  
174 method and the lowest in the V3V4 two step method (Figure S2B; variable region-  
175  $F_{1,215}=74.9989$ ,  $P<0.0001$ , PCR-  $F_{1,215}=21.0743$ ,  $P<0.0001$ ; Linear Mixed Model with organism  
176 as random factor). After quality filtering and the identification of bacterial reads, an average of  
177 0.46 Gb of shotgun reads per sample was achieved (range 0.03 to 2.1 Gb) (Figure S3A, for final

178 sample sizes see Table S1). To provide an initial assessment and comparison between the  
179 amplicon and shotgun-based techniques, we plotted the discovered classifiable taxa and  
180 functions for the entire pooled dataset. Although the methods differ distinctly, each method  
181 shows a plateau in the number of discovered entities (see Figure S3C, S3D).

182 **Mock community:** The analysis of standardized mock communities is an important measure to  
183 ensure general quality standards in microbial community analysis. In this study we employed a  
184 commercially available mixture of eight bacterial- and two yeast species. Comparison among the  
185 amplification procedures (one- and two step PCR), 16S rRNA gene regions (V1V2, V3V4) and  
186 shotgun data reveals varying degrees of similarity to the expected microbial community  
187 composition (Figure 1). One discrepancy is apparent due to the misclassification of  
188 *Escherichia/Shigella*, whose close relationship make delineation at the genus level difficult  
189 based on the V1V2 region are subsequently classified to *Enterobacteriaceae* (Figure 1A, Figure  
190 S4). Classification of this bacterial group also differs according to shotgun pipeline employed,  
191 due to different naming and taxonomic standards of the respective databases (*Escherichia*,  
192 *Shigella*, *Enterobacteriaceae* refer to the *Escherichia/ Shigella* cluster) [18]. However, overall the  
193 amplicon-based profiles show the closest matches to the expected community. The V1V2 one  
194 step method and Kraken show the lowest degree of deviation between observed and expected  
195 abundances of the focus taxa (Table 1, Figure S4). However, Kraken falsely detects a large  
196 number of taxa not present in the mock communities. In addition, the relative abundances of  
197 fungi in the mock community were relatively well predicted by MEGAN and Kraken, while  
198 MetaPhlan2 failed to identify *Cryptococcus* and replaced it with several other taxa (see Figure  
199 1).

200 Next, we evaluated alpha and beta diversity across the different technical and analytical  
201 methods. Interestingly, most methods overestimate taxon richness but underestimate complexity  
202 (as measured by the Shannon index) of the mock community, which could reflect biases arising  
203 from grouping taxon abundances together (Figure 1, Figure S4, Figure S5, Table S2). Overall  
204 the amplicon methods appear to more accurately reflect alpha diversity, although significant  
205 differences are present with regard to the amplified region (species richness: variable region-  
206  $F_{1,10}=6.3657$ ,  $P=0.0302$ ; Shannon H: method-  $F_{1,9}=3.330$ ,  $P=0.1014$ , variable region-  $F_{1,9}=6.110$ ,  
207  $P=0.0354$ ). With regard to beta diversity, the largest distance to the expected composition is  
208 observed in SortmeRNA applied to shotgun sequencing of the mock community, while the  
209 amplicon-based techniques, MEGAN, and MetaPhlan2 show the lowest distance (Figure 1D,  
210 Figure S5, Table S3). Pairwise tests show almost no differences between the amplicon-based  
211 techniques, while all shotgun based methods significantly differ from each other (Table S4).



212 Thus, in conclusion shotgun-based analysis pipelines yield a higher degree of variability/error  
213 compared to the amplicon-based approaches based on a simple mock community. For  
214 subsequent analyses we thus mainly focus on the amplicon-based data and MEGAN as a  
215 representative shotgun-based pipeline, for which eukaryotic (e.g. fungal) sequences were not  
216 included in the following analyses.

217 **Taxonomic diversity within and between hosts:** To evaluate the performance of our panel of  
218 metagenomic methods over the range of complex host-associated communities in our  
219 consortium, we next employed a panel of alpha- and beta diversity analyses to these samples,  
220 which also provides an opportunity to infer broad patterns across animal taxa based on a  
221 standardized methodology. Measures of alpha diversity display overall consistent values with  
222 respect to host species, although many significant differences between technical methods are  
223 present, mostly in a host-specific manner (Figure 2A-B). However, several host taxa display high  
224 levels of consistency across methods including *A. aurita*, *C. elegans*, *D. melanogaster* and  
225 *H. sapiens*, which show almost no significant differences between methods. Discrepancies and  
226 individual recommendations for each host species are discussed in the Supplementary Material  
227 (see Figures S6-S16). An intriguing observation is the tendency of aquatic hosts to display  
228 higher alpha diversity values than those of terrestrial hosts, which is supported by average  
229 differences between aquatic and terrestrial hosts and by relative consistent comparisons among  
230 single host species as well (Figure 2C-D, Table S5). Finally, we also compared alpha diversity  
231 estimates based on the other shotgun-based classifiers, which in most cases display greater  
232 heterogeneity than among the 16S rRNA gene amplicon and MEGAN based estimates alone,  
233 but still recover similar trends (Figure S17).

234 In order to investigate broad patterns of bacterial community similarity according to  
235 metagenomic procedure and host species, we performed beta diversity analyses including all  
236 host samples and each of their five different methodological profiles. This analysis reveals an  
237 overall strong signal of host species, irrespective of the method used to generate community  
238 profiles (Table 2, Figure 3). Pairwise comparisons between hosts are significant in all cases  
239 except for samples derived from the V3V4 two step protocol, which did not consistently reach  
240 significance after correction for multiple testing (Table S6). Further, complementary to the  
241 observations made for alpha diversity, we also find strong signals of community differentiation  
242 between the aquatic and terrestrial hosts (Table 2, Figure 3B and D). The separation between  
243 these environments appears to be stronger based on amplicon data, whereas the separation  
244 between hosts is stronger based on shotgun derived data (Table 2). Clustering of communities  
245 based on host environment is consistent irrespective of the underlying shotgun analysis method,



246 although the topologies vary strongly (e.g. MetaPhlan2, see Figure S18). To further evaluate the  
247 variability among biological replicates, we evaluated intra-group distances according to host  
248 species, which reveals organisms with generally higher community variability (i.e. *C. elegans*,  
249 *A. aurita*, *H. sapiens*, *H. vulgaris*, *T. aestivum*, and *M. leidy*) than other host organisms in our  
250 study (*N. vectensis*, *M. musculus*, *D. melanogaster*, and *A. aerophoba*; Figure S19A, C).  
251 Interestingly, intra-group distances also significantly differ between the aquatic and terrestrial  
252 environments, whereby aquatic organisms tend to display less variable communities than  
253 terrestrial ones (Figure S19B, D). The low performance of *T. aestivum* in subsequent analyses  
254 possibly originates from its commercial origin and low bacterial biomass relative to host material.

255 To identify individual drivers behind patterns of beta diversity, we performed indicator  
256 species analysis [19] at the genus level with respect to method, host species, and environment.  
257 Based on the amplicon data we identified 56 of 313 indicators to display consistent associations  
258 across all four amplicon techniques, such as *Bacteroides*, *Barnesiella*, *Clostridium IV*, and  
259 *Faecalibacterium* in *H. sapiens*, and *Helicobacter* and *Mucispirillum* in *M. musculus*, whereas  
260 other associations were limited to e.g. only one variable region (Table S7, S8). However, the  
261 overall pattern of host associations is largely consistent across methods (Figure S20). We also  
262 identified numerous indicator genera for aquatic and terrestrial hosts (Table S9, S10). Indicator  
263 analyses based on shotgun data reveals a smaller and less diverse set of host-specific  
264 indicators, which however show many congruencies with the amplicon-based data.

265 **Functional diversity within and between hosts:** To examine the diversity (gene richness) of  
266 metagenomic functions across host species we evaluated EggNOG [20] annotations (assembly-  
267 based and MEGAN) to obtain a general functional spectrum (evolutionary genealogy of genes:  
268 Non-supervised Orthologous Groups), in addition to annotations derived from a database  
269 dedicated to functions interacting with carbohydrates (CAZY- Carbohydrate-Active enZYmes)  
270 [21]. Overall the individual host communities differ drastically in gene richness (EggNOG genes  
271 (MEGAN):  $\chi^2=52.202$ ,  $P<2.10\times 10^{-16}$ ; EggNOG genes (assembly):  $\chi^2=49.986$ ,  $P<2.10\times 10^{-16}$ ;  
272 CAZY:  $\chi^2=48.815$ ,  $P<2.10\times 10^{-16}$ ; approximate Kruskal-Wallis test). Although the values also  
273 differ considerably between methods, overall the functional repertoires are most diverse in the  
274 vertebrate hosts, while only *H. vulgaris* and *A. aerophoba* as aquatic hosts carry a comparably  
275 diverse functional repertoire (Figure 4A, Figure S21). Interestingly, in contrast to taxonomic  
276 diversity we observe no difference in functional diversity between aquatic and terrestrial hosts.

277 Next we examined community differences (beta diversity) at the functional level, which  
278 are overall more pronounced (average adj.  $R^2$ : 0.5084, Figure 4) than those based on taxonomic

279 (genus level) classification (shotgun adj.  $R^2$ : 0.4756; amplicon average adj.  $R^2$ : 0.4594, see  
280 Table 2 and Table 3, Figure 3 and Figure 4, Figure S22). On the functional level aquatic and  
281 terrestrial hosts are considerably less distinct than observed at the taxonomic level (taxonomic  
282 shotgun adj.  $R^2$ =0.0766; taxonomic amplicon average adj.  $R^2$ =0.0690, functional shotgun  
283 average adj.  $R^2$ =0.0441, see Table 2 and Table 3, Figure 4, S22). Variability of the functional  
284 repertoires was lowest in *A. aerophoba*, *D. melanogaster* feces and *M. musculus* gut contents,  
285 while *H. vulgaris*, *C. elegans*, and *D. melanogaster* gut samples displayed the highest intra-  
286 group distances, which translates to a higher amount of functional heterogeneity between  
287 replicates (Figure S23). This reflects in large part the patterns we observed in taxonomic  
288 variability of those host-associated communities (Figure S19).

289 **Indicator functions:** To identify specific functions that are characteristic of individual hosts, we  
290 applied indicator analysis to functional categories. General functions in EggNOG reveal several  
291 interesting patterns, including CRISPR related genes in *A. aerophoba*, *H. sapiens*, and  
292 *H. vulgaris*, suggesting a particular importance of viruses in these communities. *A. aerophoba*  
293 possess a large set of characteristic genes involved in energy production and conversion, amino  
294 acid transport and metabolism, replication, recombination and repair. *M. musculus* and others  
295 appear to possess a large number of characteristic genes involved in carbohydrate transport  
296 and metabolism, energy production and conversion, transcription and cell  
297 wall/membrane/envelope biogenesis. *H. vulgaris* is characterized by a high number of genes  
298 involved in transcription, inorganic ion transport, metabolism, signal transduction mechanisms  
299 and cell wall/membrane/envelope biogenesis (Table S11-S13).

300 Analysis of carbohydrate-metabolizing functions based on CAZY [21] (Carbohydrate-  
301 Active enZYmes) reveals the highest number of characteristic glycoside hydrolases (GH) in  
302 *H. sapiens* and *M. musculus*, whereas polysaccharide lyases (PLs) for non-hydrolytic cleavage  
303 of glycosidic bonds are present in *A. aerophoba* and *H. sapiens* (Table S14). Parts of the  
304 cellulosome are only present in *A. aerophoba* and not in *M. musculus* or *H. sapiens*.  
305 Interestingly, only the freshwater *H. vulgaris* carries characteristic auxiliary CAZYS involved in  
306 lignin and chitin digestion, which may reflect dietary adaptations of the host.

307 **Performance of metagenome imputation from 16S rRNA gene amplicon data using**  
308 **PICRUSt across metaorganisms:** Researchers often desire to obtain the insight gained from  
309 functional metagenomic information despite being limited to 16S rRNA gene data, for which  
310 imputation methods such as PICRUSt can be employed [5]. However, due to their dependence  
311 on variable region and database coverage [5], these imputations must be viewed with caution.

312 Given our data set of both 16S amplicon- and shotgun metagenomic sequences, we  
313 systematically evaluated the performance of PICRUSt predictions across hosts and amplicon  
314 data type (V1V2, V3V4, one step/ two step protocol). Beginning with the mock community, the  
315 V1V2 region displays lower performance for imputing functions compared to V3V4, as indicated  
316 by a higher weighted Nearest Sequenced Taxon Index (NSTI) ( $t=17.812$ ,  $P=1.119\times 10^{-7}$ , Figure  
317 S24). High NSTI values imply low availability of genome representatives for the respective  
318 sample, due to either large phylogenetic distance for each OTU to its closest sequenced  
319 reference genome or a high frequency of poorly represented OTUs [5]. Comparing the  
320 distribution of functional categories based on Clusters of Orthologous Groups (COG) [22]  
321 between the different imputations (no cutoff applied) and the actual shotgun based repertoires  
322 reveals considerable overlap (Figure S24). Exceptions include the functional category R  
323 (general function prediction only), which is almost absent in the shotgun data, while the category  
324 S (function unknown) is more abundant among the shotgun based functional data (Figure S24).

325 Next we evaluated functional imputations for the different host species and amplification  
326 methods. We found no significant difference in average NSTI values or prediction success  
327 ( $\text{NSTI} < 0.15$ ) between amplification protocols or variable region. However, approximately a third  
328 (31.8%) of the samples are lost due to incomplete imputation ( $\text{NSTI} > 0.15$ ; Figure 5A). Notable  
329 problematic host taxa are *A. aerophoba* and *H. vulgaris*, for which no sample remained below  
330 the NSTI cutoff value. Other host taxa displayed clear differential performance with regard to the  
331 variable region used, whereby *H. sapiens*, *N. vectensis* and *T. aestivum* were successfully  
332 predicted based on V3V4, but not V1V2. However, when we employ Procrustes tests to  
333 compare community functional profiles based on shotgun sequencing (single assembly,  
334 MEGAN) and functional imputations at the COG-category level, we find a lower correspondence  
335 of the V3V4-based imputations compared to those based on V1V2 (Figure 5B), while the  
336 amplification methods displayed no significant difference. A similar pattern is observed when we  
337 correlate community differences based on shotgun results and lower level (single functions)  
338 COG annotations based on PICRUSt, although the difference is not significant ( $F_{1,18}=0.6172$ ,  
339  $P=0.4423$ ).

340 To investigate the similarities among methods in more detail, we merged shotgun and  
341 PICRUSt based annotations at the level of COG categories. Principle coordinate analysis  
342 reveals only small differences between imputations with regard to amplification method or  
343 variable region (Figure 5C). However, large differences exist between the PICRUSt and shotgun  
344 based functional repertoires, as well as between the shotgun techniques (MEGAN, single  
345 assembly). Differences between the shotgun techniques were significant, but smaller than their

346 distance to the imputed functional spectra (Figure 5C, Table S15). Finally, we examined the  
347 abundance of functional categories within single host taxa and the mock community, which  
348 reveals a higher relative abundance of functions related to energy production and conversion  
349 (C), replication, recombination and repair (L), and unknown functions (S) in the assembly-based  
350 annotations compared to the other techniques, which might be an important driver of the  
351 observed differences (Figure S24, S25).

352 Thus, in summary, the PICRUSt imputed functional repertoires significantly differ from  
353 actual shotgun profiles. While variation in imputation success is largely dependent on the identity  
354 of the particular host community, V3V4 appears to more often yield successful imputations.  
355 However, when successful, V1V2-derived imputations display closer similarity to actual  
356 functional profiles. Finally, the amplification method (one step, two step) appears to have no  
357 significant effect on the quality of functional imputation. These data therefore support the notion  
358 that metagenome imputations should be evaluated with care, as they depend on the underlying  
359 variable region and sample source.

360 **Phylogenetic patterns in microbial community composition:** The term “phylosymbiosis”  
361 refers to the phenomenon where the pattern of similarity among host-associated microbial  
362 communities parallels the phylogeny of their hosts [23]. Highly divergent hosts with drastic  
363 differences in physiology and life history might be expected to overwhelm the likelihood of  
364 observing phylosymbiosis, which is typically observed within a given host clade [23]. However,  
365 the factors driving differences in composition among our panel of hosts may also be expected to  
366 vary in terms of the bacterial phylogenetic scale at which they are most readily observed [24].  
367 Thus, we evaluated the degree to which bacterial community relationships (beta diversity) reflect  
368 the underlying phylogeny of our hosts at a range of bacterial taxonomic ranks, spanning from the  
369 genus to the phylum level.

370 In order to assess the general overlap between beta diversity and phylogenetic distance  
371 of the host species, we performed Procrustes analysis [25]. These analyses reveal that the  
372 strongest phylogenetic signal is observed when bacterial taxa are grouped at the order and/or  
373 family level, whereby the one step protocols and the V3V4 region display greater correlations to  
374 phylogenetic distance (Figure 6A). A similar pattern is observed for shotgun based community  
375 profiles (*i.e.* MEGAN), although its fit increases again at the genus level. Measuring beta  
376 diversity based on co-occurrence of bacterial taxa between hosts (Jaccard) displays a weaker  
377 correspondence to host phylogeny than the abundance-based measure (Bray-Curtis) (Figure 6).

378 To assess the fit of individual host taxa, we examined the residuals of the correlation  
379 between community composition and phylogenetic distance. This reveals a large variation in  
380 correspondence among host taxa, with *M. musculus*, *M. leidy*, *H. sapiens* and *D. melanogaster*  
381 (feces) displaying the highest, while *H. vulgaris*, *C. elegans*, and *A. aerophoba* display the  
382 lowest correspondence between their microbiome composition and phylogenetic position  
383 (largest residuals Figure S26). Furthermore, terrestrial hosts display an overall better  
384 correspondence between co-occurrences of bacterial genera and host relatedness (V1V2 one  
385 step:  $Z=2.9578$ ,  $P=0.0025$ ), as do measurements based on V3V4 (one step:  $Z=2.7496$ ,  
386  $P=0.0054$ ; two step:  $Z=2.8097$ ,  $P=0.0046$ ; approximate Wilcoxon test).

387 Next, given the peak of correspondence between bacterial community composition and  
388 host phylogeny observed at the order and/or family level, we set out to identify individual  
389 community members whose abundances best correlate to host phylogenetic distance using  
390 Moran's eigenvector method [26]. This reveals 41 bacterial families and 36 orders with  
391 significant phylogenetic signal based on one or more amplicon data set, whereby 16 families  
392 and 18 orders display repeated associations across methods (e.g. *Clostridia*, *Ruminococcaceae*,  
393 *Helicobacteraceae*, *Lachnospiraceae*, *Coriobacteriaceae*, *Erysipelotrichaceae*,  
394 *Selenomonadales*, *Bacteroidales*, *Desulfovibrionales*; Table S16; Figure S27, S28). Analyzing  
395 communities based on shotgun data on the other hand identifies 215 bacterial families and 97  
396 orders associated with phylogenetic distances, whereby 69 and 27 display repeated  
397 associations, respectively (Table S17; Figure S29, S30). The combined results of these  
398 analyses identify several families and orders with strong and consistent phylogenetic  
399 associations, in particular for the vertebrate hosts (e.g. *Bacteroidaceae*/ *Bacteroidales*,  
400 *Bifidobacteriaceae*/ *Bifidobacteriales*, *Coriobacteriaceae*/ *Coriobacteriales*, *Desulfovibrionaceae*/  
401 *Desulfovibrionales*, *Erysipelotrichaceae*/ *Erysipelotrichales*, *Porphyromonadaceae*/  
402 *Bacteroidales*, *Ruminococcaceae*/ *Clostridiales*, *Selenomonadales*; see Table S16). Other  
403 individual examples include bacteria related to *Helicobacteraceae*/ *Campylobacterales* in  
404 *A. aurita*, which are observed in other marine cnidarians and may be involved in sulfur oxidation  
405 [27]. *Alcanivoracaceae*, an alkane degrading bacterial group, is strongly associated to the  
406 coastal cnidarian *N. vectensis*. This association might originate from adaptation to a polluted  
407 coastal environment [28]. *Acidobacteria Gp6* and *Gp9* specifically occur in *A. aerophoba* and are  
408 commonly associated to the core microbial community of sponges [29].

409 **Phylogenetic patterns in functional community composition:** In order to contrast the  
410 patterns observed at the taxonomic level to those based on function we used Procrustes  
411 correlation to measure the overlap between phylogenetic distance and community distance



412 based on the panel of functional categories in our analyses. Interestingly, the two functional  
413 categories displaying the greatest correspondence to host phylogeny are the CAZY and single  
414 EggNOG based functions (Figure 6). The remainder of patterns between phylogeny and  
415 bacterial functional spectra differed among the host species and functional categories (Figure  
416 S26), *T. aestivum* and *D. melanogaster* (feces) display the lowest correspondence, while  
417 *C. elegans*, *M. musculus* and *H. sapiens* display the best correspondence (lowest residuals,  
418 Figure S26) between their functional repertoire and phylogenetic position. As observed for the  
419 taxonomic analyses, terrestrial hosts again display a slightly better correlation than aquatic hosts  
420 (smaller residuals), in particular for the co-abundance of EggNOG categories ( $Z=2.2116$ ,  
421  $P=0.0267$ ), CAZY ( $Z=2.0393$ ,  $P=0.0414$ ) and the co-occurrence of EggNOG categories  
422 ( $Z=2.7377$ ,  $P=0.0061$ ) and genes ( $Z=3.3062$ ,  $P=0.0007$ ; approximate Wilcoxon test) among  
423 hosts.

424 Finally, to reveal individual functions correlating to host phylogeny, we used the  
425 aforementioned Moran's I eigenvector analyses with additional indicator analyses to narrow the  
426 potential clade associations. Interestingly, most functions that correlate to a specific host  
427 taxon/clade (1-3 taxa) are mainly restricted to vertebrate hosts or in combination with a  
428 vertebrate host (Table S18-S21). This pattern is repeated across all functional annotations used  
429 in this study. Examples include fucosyltransferases, fucosidases, polysaccharide binding  
430 proteins, as well as hyaluronate, xanthan, and chondroitin lyases that stem from CAZY (see  
431 Figure S31, Table S18). These functions are all related to glycan- and mucin degradation and  
432 interaction, which mediate many intimate host-bacterial interactions and are also observed in  
433 subsequent analyses based on general functional databases (EggNOG; Table S19, Table S20).  
434 Many other phylogenetically correlated functions appear to be driven by the vertebrate hosts as  
435 well, which likely reflects the high functional diversity within this group (see Figure 4 and Figure  
436 S23). Only LPXC and LPXK (EggNOG), genes involved in the biosynthesis of the outer  
437 membrane, are exclusively associated to the non-vertebrate hosts (LPXC: UDP-3-O-acyl-N-  
438 acetylglucosamine deacetylase, LPXK: Tetraacyldisaccharide 4'-kinase), as is an oxidative  
439 damage repair function (MSRA reductase) associated to *H. vulgaris* (Table S19, Figure S31).  
440 EggNOG category Q (secondary metabolites biosynthesis, transport and catabolism) is also  
441 characteristic of invertebrate hosts in addition to a small number of metabolic functions (*i.e.*  
442 dehydrogenases, mono oxygenase, fatty acid hydroxylase; MEGAN based; Table S20, Figure  
443 S31). More generally we observe a high number of genes of unknown function (S), carbohydrate  
444 transport and metabolism (G), replication, recombination and repair (L), cell  
445 wall/membrane/envelope biogenesis (M), and energy production and conversion (C) (Table S21



446 Figure S31). Finally, antibiotic resistance genes and virulence factors also show frequent  
447 phylogenetic and host specific signals (Table S19, S20; Figure S31).

448

## 449 **Discussion**

450 Despite the great number of metagenomic studies published to date, which range in their focus  
451 on technical, analytical or biological aspects, our study represents a unique contribution given its  
452 breadth of different host samples analyzed with a panel of standardized methods. In particular,  
453 the tradeoffs between 16S rRNA gene amplicon- versus shotgun sequencing concerning  
454 amplification bias, functional information and both monetary and computational costs, warrant  
455 careful consideration when designing research projects. While 16S rRNA gene amplicon-based  
456 analyses are subject to considerable skepticism and criticism, we demonstrate that in many  
457 aspects similar, if not superior characterization of bacterial communities is achieved by these  
458 methods, although discrepancies associated with shotgun based data are largely dependent on  
459 the analytic pipeline. We also show, however, that important insight can be gained through the  
460 combination of taxonomic- and functional profiling, and that imputation-based functional profiles  
461 significantly differ from actual profiles. Our findings thus provide a guide for selecting an  
462 appropriate methodology for metagenomic analyses across a variety of metaorganisms. Finally,  
463 these data provide novel insight into the broad scale evolution of host-associated bacterial  
464 communities, which can be viewed as particularly reliable given the repeatability of observations  
465 (*e.g.* differences between aquatic and terrestrial hosts, indicator taxa) across methods.

466         Given the concerns regarding the accuracy of 16S rRNA gene amplicon sequencing,  
467 other studies such as that of Gohl *et al.* [8] performed systematic comparisons of different library  
468 preparation methods, and found superior results for a two step amplification procedure. This  
469 method offers the additional advantage that one panel of adapter/barcode sequences can be  
470 combined with any number of different primers. Our first analyses were based on a standard  
471 mock community including Gram positive and Gram negative bacteria from the Bacilli and  
472 Gamma Proteobacteria (eight species), as well as two fungi, which did not support an  
473 improvement of performance based on the two step protocol. However, a number of changes  
474 were made to the Gohl *et al.* [8] protocol to adapt it to our lab procedures (*e.g.* larger reaction  
475 volumes, polymerase, variable region, heterogeneity spacers) that may contribute to these  
476 discrepancies, in addition to our different and diverse set of samples and other factors with  
477 potential influence on the performance of amplicon sequencing [6-8, 30-32]. The complexity of  
478 the mock community, *i.e.* the number of taxa, distribution, and phylogenetic breadth, may also

479 have an influence on the discovery of clear trends in amplification biases or detection limits for  
480 certain taxonomic groups [33]. Thus, the even and phylogenetically shallow mock community in  
481 our study may be less suited than the staggered and diverse mixtures used in other studies [8],  
482 but still provides valuable information on repeatability, primer biases, and accuracy [33].  
483 Nonetheless, when applied to our range of complex host-associated communities, we also found  
484 that significant differences in most parameters were due to the variable region rather than  
485 amplification method, and in many cases biological signals were either improved- or limited to  
486 the one step protocol.

487 Additional sources of variation influencing the outcome of our 16S rRNA gene amplicon-  
488 based community profiling are the bioinformatic pipelines we employed, starting from trimming  
489 and merging to clustering and classification, which are stringent and incorporate more reliable  
490 *de novo* clustering algorithms [34] as well as different classification databases [35].  
491 Heterogeneity among the different amplicon approaches is however far smaller than the  
492 observed heterogeneity between amplicon and shotgun methods, or within different shotgun  
493 analyses, as observed in other benchmarking studies [31]. Differences between shotgun  
494 approaches have been investigated in detail and also yield varying performances among  
495 classifiers, but in general find a comparatively high performance of MEGAN based approaches  
496 [9, 36, 37], which we also confirm in our study.

497 Given the limited number of studies that have compared imputed- and shotgun derived  
498 functional repertoires [5, 38], our study also provides important additional insights. As imputation  
499 by definition is data-dependent, the differential performance and prediction among hosts in our  
500 study may in large part be explained by the amount of bacteria isolated, sequenced, and  
501 deposited (16S rRNA or genome) from these hosts or their respective environments. This seems  
502 to be most critical for the aquatic hosts. Furthermore, we observe a clear effect of variable region  
503 on the prediction performance, which is most obvious based on the mock community. The  
504 PICRUSt algorithm was developed and tested using primers targeting V3V4 16S rRNA, thus  
505 optimization of the imputation algorithm might be biased towards this target over the V1V2  
506 variable region. Although these performance differences, in particular the bias towards model  
507 organisms compared to less characterized communities (e.g. hypersaline microbial mats), were  
508 previously shown [5], our study provides additional, experimentally validated guidelines for a  
509 number of novel host taxa.

510 Interestingly, the strongest correspondence between bacterial community similarity and  
511 host genetic distance was detected at the bacterial order level for most of the employed

512 methods. This may on the one hand reflect the deep phylogenetic relationships between our  
513 host taxa, such that turnover of bacterial taxa erodes phyllosymbiosis over time [23, 24]. On the  
514 other hand, some of the more striking observations made among our host taxa are the  
515 differences between aquatic and terrestrial hosts, both at the level of alpha and beta diversity.  
516 Based on a molecular clock for the 16S rRNA gene of roughly 1% divergence per 50 million  
517 years [39], bacterial order level divergence corresponds well with the timing of animal  
518 terrestrialization (425-500 MYA) [40, 41]. Although evolutionary rates can widely vary among  
519 bacteria species [42], other studies of individual gut microbial lineages such as the *Enterococci*  
520 indicate that animal terrestrialization was indeed a likely driver of diversification [43]. Specifically  
521 the changing availability of carbohydrates in the host gut can be seen as a main driver of this  
522 diversification, which is consistent with the association of CAZY-based functional repertoires  
523 correlating to phylogenetic distance in our data set [23, 44].

524 In contrast to the patterns observed based on 16S rRNA gene amplicon-based profiles,  
525 the differentiation of bacterial communities according to host habitat was less pronounced based  
526 on functional genomic repertoires. This raises the possibility that the colonization of land by  
527 ancient animals required the acquisition of new, land-adapted bacterial lineages to perform  
528 some of the same ancestral functions. The overall observation of increased beta diversity among  
529 terrestrial- compared to aquatic hosts (Figure S19) could in part reflect differential acquisition  
530 among host lineages after colonizing land, although dispersal in the aquatic environment may on  
531 the other hand act as a greater homogenizing factor among aquatic hosts. The stronger  
532 correspondence between bacterial community- and host phylogenetic distance among terrestrial  
533 hosts is also generally consistent with this hypothesis. However, the higher alpha diversity and  
534 the slightly lower correspondence with the phylogenetic patterns in aquatic hosts may also  
535 indicate a higher influence of environmental bacteria or a lack of physiological control over  
536 bacterial communities.

537 Bacterial taxa and functions involved in carbohydrate utilization were among the most  
538 notable associations to individual hosts, groups of hosts, and/or host phylogenetic relationships.  
539 Taxa such as *Bacteroidales*, *Ruminococcaceae/ Ruminococcales*, and *Clostridia* associated to  
540 humans and/or mice include members known for a mucosal lifestyle, and these hosts also  
541 display the most diverse and abundant repertoire of carbohydrate active enzymes (particularly  
542 glycosylhydrolases) in their microbiome. Other examples include sialidases, esterases, and  
543 fucosyltransferases, as well as different extracellular structures that appear to be specific to  
544 aquatic hosts, indicating differences in mucus and glycan composition according to this host  
545 environment. Glycan structures provide a direct link between the microbial community and the

546 host via attachment, nutrition, and communication [45, 46], and the composition of mucin and  
547 glycan structures themselves show strong evolutionary patterns and are distinct among  
548 taxonomic groups [44]. Thus, a high diversity of glycan structures within and between hosts may  
549 determine the specific sets carbohydrate facilitating enzymes of the respective microbial  
550 communities.

551 In addition to the bacterial carbohydrate hydrolases that digest surrounding host and  
552 dietary carbohydrates, we also identified a number of glycosyltransferases associated with  
553 capsular polysaccharide synthesis (Table S19, Table S20). This type of glycosylation is an  
554 important facilitator for host association and survival [47] and plays a crucial role in infections  
555 [48]. The capsule prevents opsonization and phagocytosis through the host immune system and  
556 gives the bacterium the ability to modulate its interaction with the host environment [47, 49]. This  
557 type of manipulation is performed by mutualists and pathogens alike [47, 50] via molecular  
558 mimicry and tolerogenic immune modulation [51, 52]. Bacterial glycan products like  
559 polysaccharide A (PSA) may also have direct benefits for the host, as it can interfere with the  
560 host immune system by increasing immunologic tolerance, or inhibit the binding of other  
561 microbes (*e.g. Helicobacter hepaticus* [53]). Thus, capsular and excreted glycan structures are  
562 important for the successful colonization and persistence in different environments [54, 55] and  
563 host organisms [47, 55].

564

## 565 **Conclusions**

566 In summary, the systematic comparison of five different metagenomic sequencing  
567 methods applied to ten different holobiont yielded a number of novel technical and biological  
568 insights. Although important exceptions will exist, we demonstrate that broad scale biological  
569 patterns are largely consistent across these varying methods. While the richer information  
570 provided by shotgun sequencing is clearly desirable and is likely to surpass amplicon-based  
571 profiling techniques in the foreseeable future, technical variability among analytical pipelines  
572 currently surpasses that observed between different amplicon methods. As many aspects of  
573 differential performance in our study are host-specific (more detailed description of individual  
574 hosts can be found in the Supplementary Material), future development and benchmarking  
575 analyses would also benefit from a including a range of different host/environmental samples.

576

## 577 **Methods**

578 **DNA extraction and 16S rRNA gene amplicon sequencing:** Protocols for each host type are  
579 described in the Supplementary Material (see also Figure S18-S28). Each library (16S rRNA  
580 gene amplicon, shotgun) included at least one mock community sample based on the  
581 ZymoBIOMICS™ Microbial Community DNA Standard (Lot.: ZRC187324, ZRC187325)  
582 consisting of 8 bacterial species (*Pseudomonas aeruginosa* (10.4%), *Escherichia coli* (9.0%),  
583 *Salmonella enterica* (11.8%), *Lactobacillus fermentum* (10.3%), *Enterococcus faecalis* (14.1%),  
584 *Staphylococcus aureus* (14.6%), *Listeria monocytogenes* (13.2%), *Bacillus subtilis* (13.2%)) and  
585 two fungi (*Saccharomyces cerevisiae* (1.6%), *Cryptococcus neoformans* (1.8%)).

586 The 16S rRNA gene was amplified using uniquely barcoded primers flanking the V1 and  
587 V2 hypervariable regions (27F-338R) and V3V4 hypervariable regions (515F-806R) with fused  
588 MiSeq adapters and heterogeneity spacers in a 25 µl PCR [32]. For the traditional one step PCR  
589 protocol we used 4 µl of each forward and reverse primer (0.28 µM), 0.5 µl dNTPs (200 µM  
590 each), 0.25 µl Phusion Hot Start II High-Fidelity DNA Polymerase (0.5 U), 5 µl of HF buffer  
591 (Thermo Fisher Scientific, Inc., Waltham, MA, USA) and 1 µl of undiluted DNA. PCRs were  
592 conducted with the following cycling conditions (98°C-30s, 30x[98°C-9s, 55°C-60s, 72°C-90s],  
593 72°C-10 min) and checked on a 1.5 % agarose gel. Using a modified version of the recently  
594 published two step PCR protocol by Gohl *et al.* 2016, we employed for the first round of  
595 amplification fusion primers consisting of the 16S rRNA gene primers (V1V2, V3V4) and a part  
596 of the Illumina Nextera adapter with the following cycling conditions in a 25 µl PCR reaction  
597 (98°C-30s, 25x[98°C-10s, 55°C-30s, 72°C-60s], 72°C-10 min) [8]. Following the PCR was  
598 diluted 1:10 and 5µl of the solution were used in an additional reaction of 10 µl (98°C-30s,  
599 10x[98°C-9s, 55°C-30s, 72°C-60s], 72°C-10 min) utilizing the Nextera adapter overhangs to  
600 ligate the Illumina adapter sequence and individual MID's to the amplicons following the  
601 manufacturer's instructions. The PCR protocol we used 1 µl of each forward and reverse primer  
602 (5 µM), 0.3 µl dNTPs (10 µM), 0.2 µl Phusion Hot Start II High-Fidelity DNA Polymerase (2 U/µl),  
603 2 µl of 5xHF buffer (Thermo Fisher Scientific, Inc., Waltham, MA, USA) and 5 µl of the diluted  
604 PCR product. The concentration of the amplicons was estimated using a Gel Doc™ XR+  
605 System coupled with Image Lab™ Software (BioRad, Hercules, CA USA) with 3 µl of  
606 O'GeneRuler™ 100 bp Plus DNA Ladder (Thermo Fisher Scientific, Inc., Waltham, MA, USA)  
607 as the internal standard for band intensity measurement. The samples of individual gels were  
608 pooled into approximately equimolar subpools as indicated by band intensity and measured with  
609 the Qubit dsDNA br Assay Kit (Life Technologies GmbH, Darmstadt, Germany). Sub pools were  
610 mixed in an equimolar fashion and stored at -20°C until sequencing.

611 Library preparation for shotgun sequencing was performed using the NexteraXT kit  
612 (Illumina) for fragmentation and multiplexing of input DNA following the manufacturer's  
613 instructions. Amplicon sequencing was performed on the Illumina MiSeq platform with v3  
614 chemistry (2x300 cycle kit), while shotgun sequencing was performed via 2x150bp Mid Output  
615 Kit at the IKMB Sequencing Center (CAU Kiel, Germany).

616 **Amplicon analysis:** The respective V1V2 and V3V4 PCR primer sequences were removed  
617 from the sequencing data using *cutadapt* (v.1.8.3) [56]. Sequence data in FastQ format was  
618 quality trimmed using *sickle* (v.1.33) in paired-end mode with default settings and removing  
619 sequences dropping below 100bp after trimming [57]. Forward and reverse read were merged  
620 into a single amplicon read using VSEARCH allowing fragments with a length of 280-350 bp for  
621 V1V2 and 350-500 bp for V3V4 amplicons [58]. Sequence data was quality controlled using  
622 *fastq\_quality\_filter* (FastX Toolkit) retaining sequences with no more than 5% of per-base quality  
623 values below 30 and subsequently with VSEARCH discarding sequences with more than 1  
624 expected errors [58, 59]. Reference guided chimera removal was performed using the gold.fa  
625 reference in VSEARCH (v2.4.3). The UTX algorithm was used for a fast classification of the  
626 sequence data in order to remove sequences not assigned to the domains Bacteria or Archaea  
627 and exclude amplicon fragments from Chloroplasts [60]. Notably, only a total of 15 sequences  
628 were assigned to the domain Archaea, all found in two samples of human feces, accounting for  
629 less than 0.1% of the clean reads in these samples. The entire cleaned sequence data was  
630 concatenated into a single file, dereplicated and processed with VSEARCH for OTU picking  
631 using the UCLUST algorithm [61] using a 97% similarity threshold. OTUs were again checked  
632 for chimeric sequences, now using the *de novo* implementation of the UCHIME algorithm in  
633 VSEARCH [58, 61, 62]. All clean sequence data of the samples were mapped back to the  
634 cleaned OTU sequences using VSEARCH. OTU sequences and clean sequences mapping to  
635 the OTUs were taxonomically annotated using the RDP classifier algorithm with the RDP training  
636 set 14 [63, 64]. Sequence data were normalized by selecting 10,000 random sequences per  
637 sample. Taxon-by-sample abundance tables were created for all taxonomic levels from Phylum  
638 to Genus, as well as for OTUs.

639 **PICRUSt functional imputations:** Species level OTUs (97% similarity threshold) were further  
640 classified using the GreenGenes (August 2013) database [65] via RDP classifier as  
641 implemented in *mothur* (v1.39.5) and merged with the abundances into a biome file which was  
642 uploaded to the Galaxy PICRUSt v1.1.1 pipeline (<http://galaxy.morganlangille.com/>) to derive  
643 functional imputations (COG predictions) [5]. To achieve accurate functional predictions



644 samples with  $NSTI \leq 0.15$  (weighted Nearest Sequenced Taxon Index) were pruned from the  
645 data set, as recommended by the developers.

646 **Shotgun sequencing:** Raw demultiplexed sequences were trimmed via Trimmomatic (v0.36)  
647 for low quality regions with a minimum length of 50 bp as well as for adaptor and remaining MID  
648 sequences [66]. After trimming reads were mapped to host specific genome databases and  $\Phi X$   
649 with additional retention databases containing all fully sequenced bacterial and metagenomic  
650 genomes (05-09-2015) via DeconSeq (v0.4.3) [67]. Single and paired sequences were repaired  
651 using the BBTools (v37.28) repair function [68]. Combined sequences were searched against  
652 the non-redundant NCBI database (28-07-2017) via DIAMOND [69] with (evaluate cutoff 0.001,  
653 v0.8.28) and MEGAN [14] classifying hits by functions (EGGNOG-Oct2016) and taxa (May2017)  
654 (v6.6.1). MetaPhlan [15] (v1.7.7) and MetaPhlan2 [16] (v2.2.0) was used for taxonomic  
655 classification. Forward and reverse reads were mapped to the SIVLA non-redundant database  
656 (v123) via SortmeRNA [17, 70] (2.1b) and classified via RDP classifier and the RPD 16 database  
657 as implemented in mothur [71]. Kraken (v0.10.5-beta) database was constructed on complete  
658 and dusted genome sequences of all archaea (+scaffolds), bacteria, fungi (+scaffolds), protozoa  
659 (+scaffolds), viruses and full sequences of plasmids and plastids [13] (database 21-08-2017),  
660 which was used to classify raw reads as well as assembled contigs, which were used throughout  
661 the manuscript. For assemblies of single samples we used metaSPADES [72] (v3.9.1) using  
662 paired reads in addition to unpaired reads left from the previous steps. PROKKA (v1.12) was  
663 used for gene calling and initial genome annotation [73] using the metagenome option with  
664 additional identifying rRNAs and snRNA via barnap, ARAGORN [74], and Infernal [75]. ORFs  
665 were further annotated via EggNOG annotation via HMMER models implemented in the eggno-  
666 mapper (v0.12.7) [20, 76], CAZY database via dbCAN (v5, 07/24/2016) and HMMER3 [21, 77].  
667 Gene abundances were derived from mapping the all reads back to the predicted ORF via  
668 bowtie2 (v2.2.6) [78] and calculated TPM (transcripts per kilobase million) via SamTools (v1.5)  
669 [79].

670 18S rRNA genes were obtained from NCBI GeneBank and aligned via ClustalW (v1.4)  
671 [80] for host tree construction, which includes *A. aerophoba* (gi:51095211, AY5917991),  
672 *M. leidyi* (gi:14517703, AF2937001), *H. vulgaris* (gi:761889987, JN5940542), *A. aurita*  
673 (gi:14700050, AY0392081), *N. vectensis* (gi:13897746, AF2543821), *T. aestivum* (gi:15982656,  
674 AY0490401), *M. musculus* (gi:374088232, NR\_0032783), *H. sapiens* (gi:36162, X032051),  
675 *D. melanogaster* (gi:939630477, NR\_1335591), and *C.elegans* (gi:30525807, AY2681171).  
676 Phylogenetic distance was calculated via DNADIST (v3.5c) [81] and a maximum likelihood tree  
677 was constructed via FastTree v2.1 CAT+ $\Gamma$  model [82]. Accuracy was improved via increased

678 minimum evolution rounds for initial tree search [-spr 4], more exhaustive tree search [-mlacc 2],  
679 and a slow initial tree search [-slownni].

680 **Statistical analysis:** Statistical analyses were carried via R [83] (v3.4.3). Alpha diversity indices  
681 (richness, Shannon-Weaver index) and beta diversity metrics based on the shared presence  
682 (Jaccard distance)- or abundance (Bray-Curtis distance) of taxa were calculated in the *vegan*  
683 package [84] and ordinated via Principal Coordinate Analysis (PCoA, avoiding negative  
684 eigenvalues), or via non-metric multidimensional scaling (NMDS) using a maximum of 10000  
685 random starts to obtain a minimally stressed configuration in three dimensions. Clusters were fit  
686 via an iterative process (10'000 permutations) tested for separation by direct gradient analysis  
687 via distance based Redundancy analyses and permutative ANOVA (10'000 permutations) [85,  
688 86]. Univariate analyses were carried out with approximate Wilcoxon/Kruskal tests as  
689 implemented in *coin* [87] (10'000 permutations). Procrustes tests were used to relate pairwise  
690 community distances based on either different data sources such as functional repertoires or  
691 taxonomic composition, as well as phylogenetic distances [25, 88]. Moran's I eigenvector  
692 technique was employed to correlate bacterial community members and their functions to  
693 phylogenetic divergence, as implemented in *ape* (10'000 permutations) [26, 89] . Indicator  
694 species analysis, employing the generalized indicator value (*IndVal.g*), was used to assess the  
695 predictive value of a taxon for each respective host phenotype/category as implemented in  
696 *indicspecies* [19]. Linear mixed models, as implemented in *nlme* were used to compare the  
697 influence of amplification method or variable region without the influence of the organism of  
698 origin [90]. We employed the Hommel- and Benjamini-Yekutieli adjustment of *P*-values when  
699 advised [91, 92].

700

701 **Declarations**

702 **Ethics approval and consent to participate (Human samples):** Study participants were  
703 randomly recruited from inhabitants of Schleswig-Holstein (Germany) which were recruited for  
704 the PopGen cohort. Five individuals from the PopGen biobank (Schleswig-Holstein, Germany)  
705 were randomly selected among the healthy and unmedicated individuals and included in the  
706 study without corresponding meta-information. Study participants collected fecal samples at  
707 home in standard fecal tubes and shipped them immediately at room temperature or brought  
708 them to the collection center (within 24 h). Samples were stored at  $-80^{\circ}\text{C}$  until processing.  
709 Human feces (N=4) were sampled and extracted following the procedures as described in Wang  
710 *et al.* 2016 [93]. A biopsy sample of the sigmoid colon was taken from a healthy control  
711 individual without macro- or microscopical inflammation (N=1) and DNA was extracted as  
712 described in Rausch *et al.* 2011 [94]. Investigators were blinded to sample identities and written,  
713 informed consent was obtained from all study participants before the study. All protocols were  
714 approved by the Ethics Committee of the Medical Faculty of Kiel and by the data protection  
715 officer of the University Hospital Schleswig-Holstein in adherence with the Declaration of  
716 Helsinki Principles.

717 **Ethics approval for animal and plant samples:** Wild derived, hybrid mice were sacrificed  
718 according to the German animal welfare law and Federation of European Laboratory Animal  
719 Science Associations guidelines. Hybrid breeding stocks of wild derived  
720 *M. m. musculus*  $\times$  *M. m. domesticus* hybrids captured in 2008 are kept at the Max Planck  
721 Institute Plön (11th lab generation). The approval for mouse husbandry and experiment was  
722 obtained from the local veterinary office “Veterinäramt Kreis Plön” (Permit: 1401-144/PLÖ-  
723 004697). All sampling, including invertebrate and plant samples, was performed in concordance  
724 with the German animal welfare law and Federation of European Laboratory Animal Science  
725 Associations guidelines. Further details for each host type are provided in the Supplementary  
726 Material.

727 **Consent for publication:** Not applicable.

728 **Availability of data and material:** Sequence- and meta-data are accessible under the study  
729 identifier PRJEB30924 (“<https://www.ebi.ac.uk/ena>”). Remaining DNA from non-human samples  
730 can be made available upon request. All human samples and information on their corresponding  
731 phenotypes have to be obtained from the PopGen Biobank Kiel (Schleswig-Holstein, Germany)  
732 through a Material Data Access Form. Information about the Material Data Access Form and  
733 how to apply can be found at: “<https://www.uksh.de/p2n/Information+for+Researchers.html>”.

734 **Competing Interests:** The authors declare no competing interests.

735 **Funding:** This work was funded by the DFG Collaborative Research Centre (CRC) 1182 “Origin  
736 and Function of Metaorganisms” subproject Z3 and the Max-Planck-Society.

737 **Author contributions:** PRa, PRo, AF, TB, and JFB conceived and designed research. PRa and  
738 MR performed data analyses. PRa, MR, BH, SD, and JFB interpreted results and wrote the  
739 manuscript. PRa, MR, TD, KD, HD, SD, SF, JF, UHH, FAH, BH, MH, MJ, CJ, KABK, DL, AR,  
740 TBHR, TR, RAS, HS, RS, FS, ES, NWB, PRo, AF, TB, and JFB generated and interpreted host-  
741 specific data and gave intellectual input. All authors read and approved the final manuscript.

742 **Acknowledgements:** We thank Katja Cloppenborg-Schmidt, Melanie Vollstedt, and Dr. Sven  
743 Künzel for excellent assistance and help during the development of the project and their  
744 constant drive to improve its quality.

745

746 **Figure legends:**

747 **Figure 1:** Average community composition of bacteria (A) and fungi (B) in the mock community  
748 samples sequenced via metagenomic shotgun- and 16S rRNA gene amplicon techniques  
749 (amplicon: V1V2, V3V4, one step, two step; shotgun: MEGAN based classification (short reads),  
750 MetaPhlan (short reads), MetaPhlan2 (short reads), Kraken based classification (contigs),  
751 SortmeRNA (short reads)). (C) Bacterial genus-level alpha diversity estimates in comparison to  
752 the expected community value. (D) Principle coordinate analysis of the Bray-Curtis distance  
753 between methods and the expected community. Ellipses represent standard deviations of points  
754 within the respective groups. Sample sizes for the different approaches are  $N_{\text{shotgun}}=4$ ,  $N_{V1V2-}$   
755  $\text{one step}=3$ ,  $N_{V1V2-two step}=3$ ,  $N_{V3V4-one step}=3$ , and  $N_{V1V2-two step}=3$ .

756 **Figure 2:** Comparison of bacterial genus richness (A) and Shannon H (B) based on 16S rRNA  
757 gene amplicon and shotgun derived genus profiles based on MEGAN highlighting the  
758 differences between variable regions, amplification methods, and metagenomic classifier, as  
759 well as between the different host organisms. Colors show significance of amplification methods  
760 (A, C) or pairwise comparisons of methods (B, D) based on pairwise *t*-tests with Hommel *P*-  
761 value adjustment (A, B), and approximate Wilcoxon test for the comparison between  
762 environmental categories (C, D). Mean values are shown in grey symbols in plots A and B.  
763 Sample sizes are indicated below the samples.

764 **Figure 3:** Non-metric Multidimensional Scaling of Bray-Curtis distances based on genus profiles  
765 derived from the different 16S rRNA gene amplicon methods (V1V2/ V3V4, one step/ two step)  
766 and shotgun derived genus profiles highlighting (A) host differences and (B) differences between  
767 host environments (terrestrial/aquatic; see Table 2). Non-metric Multidimensional Scaling of  
768 Jaccard distances based on genus profiles derived from the different 16S rRNA gene amplicon  
769 methods and shotgun derived genus profiles highlighting (C) host taxon differences and (D)  
770 differences between host environments (terrestrial/aquatic; see Table 2). Both panels show a  
771 separation based on host organisms and environments and not by method. Large symbols  
772 indicate the centroid of the respective host groups and vertical lines help to determine their  
773 position in space. Samples sizes are equal to Figure 2 (see also Table S1).

774 **Figure 4:** Multivariate correlation (Procrustes analyses) of phylogenetic distance among host  
775 organisms and community distances based on 16S rRNA gene amplicon- or shotgun derived  
776 community profiles at different taxonomic cutoffs, from Phylum to Genus and species level OTUs  
777 in the amplicon based profiles. Similar results are shown for the correspondence between  
778 functional composition based distances derived from imputed COGs and COG categories

779 imputed from PICRUSt, and EggNOG derived genes and COG categories, as well as CAZY. All  
780 correlations are significant at  $P \leq 0.05$  (10'000 permutations). Large symbols indicate the  
781 centroid of the respective host groups and vertical lines help to determine their position in space.

782 **Figure 5:** (A) Differences in Nearest Sequenced Taxon Index (imputation success) between  
783 variable regions (average:  $Z=0.3869$ ,  $P=0.7017$ , approximate Wilcoxon test; probability: odds  
784 ratio=1.5941,  $P=0.1402$ , Fisher test) and amplification method ( $Z=0.0667$ ,  $P=0.9472$ ,  
785 approximate Wilcoxon test; probability: odds ratio=1.5511,  $P=0.1436$ , Fisher test). (B)  
786 Procrustes correlation of imputed and shotgun based COG categories among different  
787 techniques, with significantly higher correspondence between imputed and measured functional  
788 profiles in the V1V2 compared to the V3V4 region ( $F_{1,18}=7.8537$ ,  $P=0.0118$ , ANOVA). (C) Non-  
789 metric Multidimensional Scaling displays Bray-Curtis distances based on functional category  
790 abundances (COG categories) derived from PICRUSt (V1V2/ V3V4, one step/ two step) and  
791 shotgun based approaches (MEGAN, single assembly). Ellipses represent standard deviations  
792 of points within the respective groups.

793 **Figure 6:** Functional diversities were derived from the number and abundances of MEGAN  
794 based EggNOG annotations. Functional richness between (A) host organisms and (B) host  
795 environmental groups based is displayed, as well as functional differences between hosts (C)  
796 and environmental groups (D). Non-metric Multidimensional Scaling is based on Bray-Curtis  
797 distances on the differences in functional composition between the host organisms is displayed  
798 (C, D; see Table 3). Large symbols indicate the centroid of the respective groups. Functional  
799 variation of communities based on pairwise Bray-Curtis distances within host organism groups  
800 and environmental groups. Samples sizes for the host taxa is  $N=5$ , except for *D. melanogaster*  
801 gut tissue ( $N=10$ ; see Table S1).



802 **Tables:**

803 **Table 1:** Differences between expected and observed genus abundances in the mock communities ( $N_{\text{shotgun}}=4$ ,  $N_{\text{amplicon}}=3$ ) via a one-  
 804 sample *t*-test (two-sided) of relative abundances (*P*-values are adjusted via Hommel procedure).

| Members mock community        | shotgun                  |         |                         |            |                          | amplicon      |               |               |               |
|-------------------------------|--------------------------|---------|-------------------------|------------|--------------------------|---------------|---------------|---------------|---------------|
|                               | MEGAN                    | Kraken  | MetaPhlan               | MetaPhlan2 | SortmeRNA                | V1V2 one step | V3V4 one step | V1V2 two step | V3V4 two step |
| <i>Staphylococcus</i>         | 0.00002                  | 0.14039 | 0.07916                 | 0.07010    | $1.1097 \times 10^{-6}$  | 0.52446       | 0.09200       | 0.03994       | 0.21564       |
| <i>Listeria</i>               | 0.00395                  | 0.06065 | 0.02306                 | 0.06043    | $1.4751 \times 10^{-6}$  | 0.34964       | 0.53267       | 0.03003       | 0.00545       |
| <i>Bacillus</i>               | 0.00006                  | 0.09558 | 0.02219                 | 0.03638    | $3.9824 \times 10^{-7}$  | 0.21420       | 0.02818       | 0.29671       | 0.30589       |
| <i>Pseudomonas</i>            | 0.13668                  | 0.40989 | 0.62649                 | 0.46933    | $2.7877 \times 10^{-7}$  | 0.36721       | 0.05776       | 0.38147       | 0.59037       |
| <i>Escherichia/Shigella</i> * | NA                       | NA      | NA                      | NA         | $9.9378 \times 10^{-10}$ | 0.00462       | 0.45612       | 0.00237       | 0.59037       |
| <i>Shigella</i> *             | $4.6372 \times 10^{-10}$ | NA      | $8.0806 \times 10^{-8}$ | NA         | NA                       | NA            | NA            | NA            | NA            |
| <i>Escherichia</i> *          | 0.00001                  | 0.00882 | 0.00710                 | 0.28178    | NA                       | NA            | NA            | NA            | NA            |
| <i>Enterobacteriaceae</i> *   | NA                       | NA      | NA                      | NA         | NA                       | 0.87898       | 0.00004       | 0.19274       | 0.00055       |
| <i>Salmonella</i>             | $3.8092 \times 10^{-6}$  | 0.08772 | 0.02203                 | 0.03361    | $4.9348 \times 10^{-7}$  | 0.34964       | 0.05838       | 0.09712       | 0.08851       |
| <i>Lactobacillus</i>          | 0.00297                  | 0.09704 | 0.05384                 | 0.04043    | $1.4751 \times 10^{-6}$  | 0.87898       | 0.53267       | 0.38147       | 0.59037       |
| <i>Enterococcus</i>           | 0.00012                  | 0.18719 | 0.00353                 | 0.07277    | $6.3719 \times 10^{-7}$  | 0.04816       | 0.03746       | 0.01159       | 0.00951       |

805 \* *Escherichia/Shigella* relatives counted as equivalent

806

807 **Table 2:** Taxonomic distance based PERMANOVA results for differences in community composition (genus level) between host species  
 808 and host environments based on shared abundance (Bray-Curtis) and shared presence (Jaccard), based on whole genome shotgun and  
 809 different amplicon strategies (*P*-values are adjusted via Hommel procedure).

| Distance    | Factor   | Data     | Classifier    | DF    | F      | P      | $P_{\text{Hommel}}$ | $R^2$  | adj. $R^2$ |
|-------------|----------|----------|---------------|-------|--------|--------|---------------------|--------|------------|
| Bray-Curtis | organism | shotgun  | MEGAN         | 10,49 | 6.3517 | 0.0001 | 0.0001              | 0.5645 | 0.4756     |
|             |          | amplicon | V1V2-one step | 10,43 | 7.1026 | 0.0001 | 0.0001              | 0.6229 | 0.5352     |
|             |          |          | V1V2-two step | 10,42 | 4.2297 | 0.0001 | 0.0001              | 0.5018 | 0.3831     |
|             |          |          | V3V4-one step | 10,43 | 7.8964 | 0.0001 | 0.0001              | 0.6474 | 0.5654     |
|             |          |          | V3V4-two step | 10,41 | 3.7917 | 0.0001 | 0.0001              | 0.4805 | 0.3538     |

|               |             |          |               |        |        |        |        |        |        |
|---------------|-------------|----------|---------------|--------|--------|--------|--------|--------|--------|
| Jaccard       | environment | shotgun  | MEGAN         | 1,58   | 5.8958 | 0.0001 | 0.0004 | 0.0923 | 0.0766 |
|               |             | amplicon | V1V2-one step | 1,52   | 6.1588 | 0.0001 | 0.0001 | 0.1059 | 0.0887 |
|               |             |          | V1V2-two step | 1,51   | 4.6185 | 0.0001 | 0.0001 | 0.0830 | 0.0651 |
|               |             |          | V3V4-one step | 1,52   | 5.4975 | 0.0001 | 0.0001 | 0.0956 | 0.0782 |
|               |             |          | V3V4-two step | 1,50   | 3.3349 | 0.0001 | 0.0001 | 0.0625 | 0.0438 |
|               | organism    | shotgun  | MEGAN         | 10,49  | 4.7458 | 0.0001 | 0.0001 | 0.4920 | 0.3883 |
|               |             | amplicon | V1V2-one step | 10,43  | 3.6867 | 0.0001 | 0.0001 | 0.4616 | 0.3364 |
|               |             |          | V1V2-two step | 10,42  | 2.9760 | 0.0001 | 0.0001 | 0.4147 | 0.2754 |
|               |             |          | V3V4-one step | 10,43  | 4.0248 | 0.0001 | 0.0001 | 0.4835 | 0.3633 |
|               |             |          | V3V4-two step | 10,41  | 2.9343 | 0.0001 | 0.0001 | 0.4171 | 0.2750 |
|               | environment | shotgun  | MEGAN         | 1,58   | 4.3872 | 0.0001 | 0.0004 | 0.0703 | 0.0543 |
|               |             | amplicon | V1V2-one step | 1,52   | 3.8714 | 0.0001 | 0.0001 | 0.0693 | 0.0514 |
|               |             |          | V1V2-two step | 1,51   | 3.6541 | 0.0001 | 0.0001 | 0.0669 | 0.0486 |
|               |             |          | V3V4-one step | 1,52   | 4.3213 | 0.0001 | 0.0001 | 0.0767 | 0.0590 |
| V3V4-two step |             |          | 1,50          | 3.6646 | 0.0001 | 0.0001 | 0.0683 | 0.0497 |        |

810

811 **Table 3:** Functional distance based PERMANOVA results for differences in general functional community composition (EggNOG) and  
 812 carbohydrate active enzymes (CAZY) between host species and host environments based on shared abundance (Bray-Curtis) and  
 813 shared presence (Jaccard) of functions (*P*-values are adjusted via Hommel procedure).

| Distance    | Factor      | Data                      | <i>DF</i> | <i>F</i> | <i>P</i> | <i>P</i> <sub>Hommel</sub> | <i>R</i> <sup>2</sup> | adj. <i>R</i> <sup>2</sup> |
|-------------|-------------|---------------------------|-----------|----------|----------|----------------------------|-----------------------|----------------------------|
| Bray-Curtis | organism    | CAZY                      | 10,47     | 7.3323   | 0.0001   | 0.0001                     | 0.6094                | 0.5263                     |
|             |             | EggNOG categories         | 10,49     | 5.6088   | 0.0001   | 0.0001                     | 0.5337                | 0.4386                     |
|             |             | EggNOG gene+description   | 10,49     | 4.4454   | 0.0001   | 0.0001                     | 0.4757                | 0.3687                     |
|             |             | EggNOG (MEGAN categories) | 10,49     | 12.2594  | 0.0001   | 0.0001                     | 0.7144                | 0.6562                     |
|             |             | EggNOG (MEGAN gene)       | 10,49     | 8.2788   | 0.0001   | 0.0001                     | 0.6282                | 0.5523                     |
|             | environment | CAZY                      | 1,56      | 5.4257   | 0.0001   | 0.0007                     | 0.0883                | 0.0721                     |
|             |             | EggNOG categories         | 1,58      | 2.5429   | 0.0195   | 0.0195                     | 0.0420                | 0.0255                     |
|             |             | EggNOG gene+description   | 1,58      | 3.0662   | 0.0001   | 0.0007                     | 0.0502                | 0.0338                     |
|             |             | EggNOG (MEGAN categories) | 1,58      | 3.7703   | 0.0015   | 0.0030                     | 0.0610                | 0.0448                     |
|             |             | EggNOG (MEGAN gene)       | 1,58      | 3.7271   | 0.0002   | 0.0012                     | 0.0604                | 0.0442                     |
| Jaccard     | organism    | CAZY                      | 10,47     | 3.9098   | 0.0001   | 0.0001                     | 0.4541                | 0.3380                     |
|             |             | EggNOG categories         | 10,49     | 3.7179   | 0.0001   | 0.0001                     | 0.4314                | 0.3154                     |

|             |                           |       |        |        |        |        |        |
|-------------|---------------------------|-------|--------|--------|--------|--------|--------|
|             | EggNOG gene+description   | 10,49 | 2.5275 | 0.0001 | 0.0001 | 0.3403 | 0.2057 |
|             | EggNOG (MEGAN categories) | 10,49 | 7.7781 | 0.0001 | 0.0001 | 0.6135 | 0.5346 |
|             | EggNOG (MEGAN gene)       | 10,49 | 5.4989 | 0.0001 | 0.0001 | 0.5288 | 0.4326 |
| environment | CAZY                      | 1,56  | 2.5866 | 0.0003 | 0.0021 | 0.0442 | 0.0271 |
|             | EggNOG categories         | 1,58  | 1.4180 | 0.1442 | 0.1442 | 0.0239 | 0.0070 |
|             | EggNOG gene+description   | 1,58  | 1.9535 | 0.0004 | 0.0024 | 0.0326 | 0.0159 |
|             | EggNOG (MEGAN categories) | 1,58  | 3.0425 | 0.0460 | 0.0920 | 0.0498 | 0.0335 |
|             | EggNOG (MEGAN gene)       | 1,58  | 3.1222 | 0.0001 | 0.0009 | 0.0511 | 0.0347 |

814

815

816 **References:**

- 817 1. Bosch TCG, McFall-Ngai MJ: **Metaorganisms as the new frontier.** *Zoology* 2011,  
818 **114(4):185-190.**
- 819 2. McFall-Ngai M, Hadfield MG, Bosch TCG, Carey HV, Domazet-Lošo T, Douglas AE,  
820 Dubilier N, Eberl G, Fukami T, Gilbert SF *et al*: **Animals in a bacterial world, a new**  
821 **imperative for the life sciences.** *Proceedings of the National Academy of Sciences*  
822 2013, **110(9):3229-3236.**
- 823 3. Carding S, Verbeke K, Vipond DT, Corfe BM, Owen LJ: **Dysbiosis of the gut**  
824 **microbiota in disease.** *Microbial Ecology in Health and Disease* 2015, **26(1):26191.**
- 825 4. Morgan XC, Huttenhower C: **Chapter 12: Human Microbiome Analysis.** *PLoS Comput*  
826 *Biol* 2012, **8(12):e1002808.**
- 827 5. Langille MGI, Zaneveld J, Caporaso JG, McDonald D, Knights D, Reyes JA, Clemente  
828 JC, Burkpile DE, Vega Thurber RL, Knight R *et al*: **Predictive functional profiling of**  
829 **microbial communities using 16S rRNA marker gene sequences.** *Nat Biotech* 2013,  
830 **31(9):814-821.**
- 831 6. Hiergeist A, Glasner J, Reischl U, Gessner A: **Analyses of Intestinal Microbiota:**  
832 **Culture versus Sequencing.** *ILAR journal / National Research Council, Institute of*  
833 *Laboratory Animal Resources* 2015, **56(2):228-240.**
- 834 7. Tremblay J, Singh K, Fern A, Kirton ES, He S, Woyke T, Lee J, Chen F, Dangl JL, Tringe  
835 SG: **Primer and platform effects on 16S rRNA tag sequencing.** *Frontiers in*  
836 *Microbiology* 2015, **6:771.**
- 837 8. Gohl DM, Vangay P, Garbe J, MacLean A, Hauge A, Becker A, Gould TJ, Clayton JB,  
838 Johnson TJ, Hunter R *et al*: **Systematic improvement of amplicon marker gene**  
839 **methods for increased accuracy in microbiome studies.** *Nat Biotech* 2016,  
840 **34(9):942-949.**
- 841 9. Walsh AM, Crispie F, O'Sullivan O, Finnegan L, Claesson MJ, Cotter PD: **Species**  
842 **classifier choice is a key consideration when analysing low-complexity food**  
843 **microbiome data.** *Microbiome* 2018, **6(1):50.**
- 844 10. Faith JJ, Guruge JL, Charbonneau M, Subramanian S, Seedorf H, Goodman AL,  
845 Clemente JC, Knight R, Heath AC, Leibel RL *et al*: **The Long-Term Stability of the**  
846 **Human Gut Microbiota.** *Science* 2013, **341(6141):1237439.**
- 847 11. Jovel J, Patterson J, Wang W, Hotte N, O'Keefe S, Mitchel T, Perry T, Kao D, Mason AL,  
848 Madsen KL *et al*: **Characterization of the Gut Microbiome Using 16S or Shotgun**  
849 **Metagenomics.** *Frontiers in Microbiology* 2016, **7(459):459.**
- 850 12. Rinke C, Schwientek P, Sczyrba A, Ivanova NN, Anderson IJ, Cheng J-F, Darling A,  
851 Malfatti S, Swan BK, Gies EA *et al*: **Insights into the phylogeny and coding potential**  
852 **of microbial dark matter.** *Nature* 2013, **499(7459):431-437.**
- 853 13. Wood D, Salzberg S: **Kraken: ultrafast metagenomic sequence classification using**  
854 **exact alignments.** *Genome Biology* 2014, **15(3):R46.**
- 855 14. Huson D, Auch A, Qi J, Schuster S: **MEGAN analysis of metagenomic data.** *Genome*  
856 *Res* 2007, **17(3):377 - 386.**
- 857 15. Segata N, Waldron L, Ballarini A, Narasimhan V, Jousson O, Huttenhower C:  
858 **Metagenomic microbial community profiling using unique clade-specific marker**  
859 **genes.** *Nat Meth* 2012, **9(8):811-814.**
- 860 16. Truong DT, Franzosa EA, Tickle TL, Scholz M, Weingart G, Pasolli E, Tett A,  
861 Huttenhower C, Segata N: **MetaPhlan2 for enhanced metagenomic taxonomic**  
862 **profiling.** *Nat Meth* 2015, **12(10):902-903.**
- 863 17. Kopylova E, Noe L, Touzet H: **SortMeRNA: fast and accurate filtering of ribosomal**  
864 **RNAs in metatranscriptomic data.** *Bioinformatics* 2012, **28(24):3211-3217.**

- 865 18. Hong Nhung P, Ohkusu K, Mishima N, Noda M, Monir Shah M, Sun X, Hayashi M, Ezaki  
866 T: **Phylogeny and species identification of the family Enterobacteriaceae based on**  
867 **dnaJ sequences.** *Diagnostic Microbiology and Infectious Disease* 2007, **58**(2):153-161.
- 868 19. De Cáceres M, Legendre P, Moretti M: **Improving indicator species analysis by**  
869 **combining groups of sites.** *Oikos* 2010, **119**(10):1674-1684.
- 870 20. Huerta-Cepas J, Szklarczyk D, Forslund K, Cook H, Heller D, Walter MC, Rattei T,  
871 Mende DR, Sunagawa S, Kuhn M *et al*: **eggNOG 4.5: a hierarchical orthology**  
872 **framework with improved functional annotations for eukaryotic, prokaryotic and**  
873 **viral sequences.** *Nucleic Acids Research* 2016, **44**(1):286-293.
- 874 21. Cantarel BL: **The Carbohydrate-Active EnZymes database (CAZy): an expert**  
875 **resource for glycogenomics.** *Nucleic Acids Res* 2009, **37**(Database issue):233-238.
- 876 22. Tatusov RL, Natale DA, Garkavtsev IV, Tatusova TA, Shankavaram UT, Rao BS,  
877 Kiryutin B, Galperin MY, Fedorova ND, Koonin EV: **The COG database: new**  
878 **developments in phylogenetic classification of proteins from complete genomes.**  
879 *Nucleic Acids Res* 2001, **29**(1):22-28.
- 880 23. Brooks AW, Kohl KD, Brucker RM, van Opstal EJ, Bordenstein SR: **Phylosymbiosis:**  
881 **Relationships and Functional Effects of Microbial Communities across Host**  
882 **Evolutionary History.** *PLOS Biology* 2016, **14**(11):e2000225.
- 883 24. Groussin M, Mazel F, Sanders JG, Smillie CS, Lavergne S, Thuiller W, Alm EJ:  
884 **Unraveling the processes shaping mammalian gut microbiomes over evolutionary**  
885 **time.** *Nature Communications* 2017, **8**:14319.
- 886 25. Peres-Neto P, Jackson D: **How well do multivariate data sets match? The**  
887 **advantages of a Procrustean superimposition approach over the Mantel test.**  
888 *Oecologia* 2001, **129**(2):169-178.
- 889 26. Gittleman JL, Kot M: **Adaptation: Statistics and a Null Model for Estimating**  
890 **Phylogenetic Effects.** *Systematic Zoology* 1990, **39**(3):227-241.
- 891 27. Murray AE, Rack FR, Zook R, Williams MJM, Higham ML, Broe M, Kaufmann RS, Daly  
892 M: **Microbiome Composition and Diversity of the Ice-Dwelling Sea Anemone,**  
893 **Edwardsiella andrillae.** *Integrative and Comparative Biology* 2016, **56**(4):542-555.
- 894 28. Schneiker S, dos Santos VAPM, Bartels D, Bekel T, Brecht M, Buhrmester J, Chernikova  
895 TN, Denaro R, Ferrer M, Gertler C *et al*: **Genome sequence of the ubiquitous**  
896 **hydrocarbon-degrading marine bacterium Alcanivorax borkumensis.** *Nature*  
897 *Biotechnology* 2006, **24**(8):997.
- 898 29. Hentschel U, Piel J, Degnan SM, Taylor MW: **Genomic insights into the marine**  
899 **sponge microbiome.** *Nat Rev Micro* 2012, **10**(9):641-654.
- 900 30. Wu JY, Jiang XT, Jiang YX, Lu SY, Zou F, Zhou HW: **Effects of polymerase, template**  
901 **dilution and cycle number on PCR based 16 S rRNA diversity analysis using the**  
902 **deep sequencing method.** *BMC Microbiol* 2010, **10**:255.
- 903 31. D'Amore R, Ijaz UZ, Schirmer M, Kenny JG, Gregory R, Darby AC, Shakya M, Podar M,  
904 Quince C, Hall N: **A comprehensive benchmarking study of protocols and**  
905 **sequencing platforms for 16S rRNA community profiling.** *BMC Genomics* 2016,  
906 **17**(1):55.
- 907 32. Fadrosch D, Ma B, Gajer P, Sengamalay N, Ott S, Brotman R, Ravel J: **An improved**  
908 **dual-indexing approach for multiplexed 16S rRNA gene sequencing on the Illumina**  
909 **MiSeq platform.** *Microbiome* 2014, **2**(1):6.
- 910 33. Highlander S: **Mock Community Analysis.** In: *Encyclopedia of Metagenomics.* Edited  
911 by Nelson EK. New York, NY: Springer New York; 2013: 1-7.
- 912 34. Westcott SL, Schloss PD: **De novo clustering methods outperform reference-based**  
913 **methods for assigning 16S rRNA gene sequences to operational taxonomic units.**  
914 *PeerJ* 2015, **3**:e1487.



- 915 35. Werner JJ, Koren O, Hugenholtz P, DeSantis TZ, Walters WA, Caporaso JG, Angenent  
916 LT, Knight R, Ley RE: **Impact of training sets on classification of high-throughput**  
917 **bacterial 16S rRNA gene surveys.** *ISME J* 2012, **6**(1):94-103.
- 918 36. Sczyrba A, Hofmann P, Belmann P, Koslicki D, Janssen S, Dröge J, Gregor I, Majda S,  
919 Fiedler J, Dahms E *et al*: **Critical Assessment of Metagenome Interpretation—a**  
920 **benchmark of metagenomics software.** *Nature Methods* 2017, **14**(11):1063–1071.
- 921 37. Lindgreen S, Adair KL, Gardner PP: **An evaluation of the accuracy and speed of**  
922 **metagenome analysis tools.** *Sci Rep* 2016, **6**:19233.
- 923 38. Xu Z, Malmer D, Langille MGI, Way SF, Knight R: **Which is more important for**  
924 **classifying microbial communities: who's there or what they can do?** *ISME J* 2014,  
925 **8**(12):2357-2359.
- 926 39. Ochman H, Elwyn S, Moran NA: **Calibrating bacterial evolution.** *Proceedings of the*  
927 *National Academy of Sciences of the United States of America* 1999, **96**(22):12638-  
928 12643.
- 929 40. Benton MJ: **The origins of modern biodiversity on land.** *Philosophical Transactions of*  
930 *the Royal Society B: Biological Sciences* 2010, **365**(1558):3667-3679.
- 931 41. Rota-Stabelli O, Daley Allison C, Pisani D: **Molecular Timetrees Reveal a Cambrian**  
932 **Colonization of Land and a New Scenario for Ecdysozoan Evolution.** *Current*  
933 *Biology* 2013, **23**(5):392-398.
- 934 42. Kuo CH, Ochman H: **Inferring clocks when lacking rocks: the variable rates of**  
935 **molecular evolution in bacteria.** *Biol Direct* 2009, **4**:35.
- 936 43. Lebreton F, Manson AL, Saavedra JT, Straub TJ, Earl AM, Gilmore MS: **Tracing the**  
937 **Enterococci from Paleozoic Origins to the Hospital.** *Cell* 2017, **169**(5):849-861.e813.
- 938 44. Bishop JR, Gagneux P: **Evolution of carbohydrate antigens—microbial forces**  
939 **shaping host glycomes?** *Glycobiology* 2007, **17**(5):23R-34R.
- 940 45. Pickard JM, Maurice CF, Kinnebrew MA, Abt MC, Schenten D, Golovkina TV, Bogatyrev  
941 SR, Ismagilov RF, Pamer EG, Turnbaugh PJ *et al*: **Rapid fucosylation of intestinal**  
942 **epithelium sustains host-commensal symbiosis in sickness.** *Nature* 2014,  
943 **514**(7524):638-641.
- 944 46. Schwartzman JA, Koch E, Heath-Heckman EAC, Zhou L, Kremer N, McFall-Ngai MJ,  
945 Ruby EG: **The chemistry of negotiation: Rhythmic, glycan-driven acidification in a**  
946 **symbiotic conversation.** *Proceedings of the National Academy of Sciences* 2015,  
947 **112**(2):566-571.
- 948 47. Martens EC, Chiang HC, Gordon JI: **Mucosal Glycan Foraging Enhances Fitness and**  
949 **Transmission of a Saccharolytic Human Gut Bacterial Symbiont.** *Cell Host &*  
950 *Microbe* 2008, **4**(5):447-457.
- 951 48. Boulnois GJ, Roberts IS: **Genetics of capsular polysaccharide production in**  
952 **bacteria.** *Current Topics in Microbiology and Immunology* 1990, **150**:1-18.
- 953 49. Meng D, Newburg DS, Young C, Baker A, Tonkonogy SL, Sartor RB, Walker WA,  
954 Nanthakumar NN: **Bacterial symbionts induce a FUT2-dependent fucosylated niche**  
955 **on colonic epithelium via ERK and JNK signaling.** *American Journal of Physiology -*  
956 *Gastrointestinal and Liver Physiology* 2007, **293**(4):780-787.
- 957 50. Mahdavi J, Pirincioglu N, Oldfield NJ, Carlsohn E, Stoof J, Aslam A, Self T, Cawthraw  
958 SA, Petrovska L, Colborne N *et al*: **A novel O-linked glycan modulates**  
959 **Campylobacter jejuni major outer membrane protein-mediated adhesion to human**  
960 **histo-blood group antigens and chicken colonization.** *Open Biology* 2014,  
961 **4**(1):130202.
- 962 51. Severi E, Hood D, Thomas G: **Sialic acid utilization by bacterial pathogens.**  
963 *Microbiology* 2007, **153**(Pt 9):2817 - 2822.
- 964 52. Coyne MJ, Chatzidaki-Livanis M, Paoletti LC, Comstock LE: **Role of glycan synthesis**  
965 **in colonization of the mammalian gut by the bacterial symbiont Bacteroides**  
966 **fragilis.** *Proceedings of the National Academy of Sciences* 2008, **105**(35):13099-13104.



- 967 53. Mazmanian SK, Round JL, Kasper DL: **A microbial symbiosis factor prevents**  
968 **intestinal inflammatory disease.** *Nature* 2008, **453**(7195):620-625.
- 969 54. Tounkang S, Premkumar D, Gustavo S, Nathalie B, Yann B, Patricia C, Florence L,  
970 Olivier N, Brigitte G, Anne L *et al*: **Capsular glucan and intracellular glycogen of**  
971 ***Mycobacterium tuberculosis*: biosynthesis and impact on the persistence in mice.**  
972 *Molecular Microbiology* 2008, **70**(3):762-774.
- 973 55. Roberts IS: **The biochemistry and genetics of capsular polysaccharide production**  
974 **in bacteria.** *Annu Rev Microbiol* 1996, **50**(1):285-315.
- 975 56. Martin M: **Cutadapt removes adapter sequences from high-throughput sequencing**  
976 **reads.** 2011 2011, **17**(1).
- 977 57. Joshi N, Fass J: **Sickle: A sliding-window, adaptive, quality-based trimming tool for**  
978 **FastQ files.** In., 1.33 edn. <https://github.com/najoshi/sickle>; 2011.
- 979 58. Rognes T, Flouri T, Nichols B, Quince C, Mahé F: **VSEARCH: a versatile open source**  
980 **tool for metagenomics.** *PeerJ* 2016, **4**:e2584.
- 981 59. Gordon A, Hannon G: **Fastx-toolkit. FASTQ/A short-reads pre-processing tools.** In:  
982 *Unpublished Available online at: [http://hannonlab](http://hannonlab.cshl.edu/fastx_toolkit) cshl edu/fastx\_toolkit.* 2010.
- 983 60. Edgar RC: **UTAX algorithm.** In.; 2015.
- 984 61. Edgar RC: **Search and clustering orders of magnitude faster than BLAST.**  
985 *Bioinformatics* 2010, **26**(19):2460-2461.
- 986 62. Edgar RC, Haas BJ, Clemente JC, Quince C, Knight R: **UCHIME improves sensitivity**  
987 **and speed of chimera detection.** *Bioinformatics* 2011, **27**(16):2194-2200.
- 988 63. Wang Q, Garrity GM, Tiedje JM, Cole JR: **Naive Bayesian Classifier for Rapid**  
989 **Assignment of rRNA Sequences into the New Bacterial Taxonomy.** *Applied and*  
990 *environmental microbiology* 2007, **73**(16):5261-5267.
- 991 64. Cole JR, Chai B, Marsh TL, Farris RJ, Wang Q, Kulam SA, Chandra S, McGarrell DM,  
992 Schmidt TM, Garrity GM *et al*: **The Ribosomal Database Project (RDP-II): previewing**  
993 **a new autoaligner that allows regular updates and the new prokaryotic taxonomy.**  
994 *Nucl Acids Res* 2003, **31**(1):442-443.
- 995 65. McDonald D, Price MN, Goodrich J, Nawrocki EP, DeSantis TZ, Probst A, Andersen GL,  
996 Knight R, Hugenholtz P: **An improved Greengenes taxonomy with explicit ranks for**  
997 **ecological and evolutionary analyses of bacteria and archaea.** *ISME J* 2012,  
998 **6**(3):610-618.
- 999 66. Bolger AM, Lohse M, Usadel B: **Trimmomatic: a flexible trimmer for Illumina**  
1000 **sequence data.** *Bioinformatics* 2014, **30**(15):2114-2120.
- 1001 67. Schmieder R, Edwards R: **Fast Identification and Removal of Sequence**  
1002 **Contamination from Genomic and Metagenomic Datasets.** *PLoS One* 2011,  
1003 **6**(3):e17288.
- 1004 68. Bushnell B, Rood J: **BBTools bioinformatics tools, including BBMap.** In: *URL*  
1005 [http://sourceforge](http://sourceforge.net/projects/bbmap) net/projects/bbmap. 37.28 edn; 2017.
- 1006 69. Buchfink B, Xie C, Huson DH: **Fast and sensitive protein alignment using DIAMOND.**  
1007 *Nat Meth* 2015, **12**(1):59-60.
- 1008 70. Pruesse E, Quast C, Knittel K, Fuchs BM, Ludwig W, Peplies J, Glockner FO: **SILVA: a**  
1009 **comprehensive online resource for quality checked and aligned ribosomal RNA**  
1010 **sequence data compatible with ARB.** *Nucl Acids Res* 2007, **35**(21):7188-7196.
- 1011 71. Schloss PD, Westcott SL, Ryabin T, Hall JR, Hartmann M, Hollister EB, Lesniewski RA,  
1012 Oakley BB, Parks DH, Robinson CJ *et al*: **Introducing mothur: Open Source,**  
1013 **Platform-independent, Community-supported Software for Describing and**  
1014 **Comparing Microbial Communities.** *Applied and environmental microbiology* 2009,  
1015 **75**(23):7537-7541.
- 1016 72. Nurk S, Meleshko D, Korobeynikov A, Pevzner P: **metaSPAdes: a new versatile de**  
1017 **novo metagenomics assembler.** *arXiv preprint arXiv:160403071* 2016.

- 1018 73. Seemann T: **Prokka: rapid prokaryotic genome annotation**. *Bioinformatics* 2014,  
1019 **30**(14):2068-2069.
- 1020 74. Laslett D, Canback B: **ARAGORN, a program to detect tRNA genes and tmRNA**  
1021 **genes in nucleotide sequences**. *Nucleic Acids Research* 2004, **32**(1):11-16.
- 1022 75. Kolbe DL, Eddy SR: **Fast filtering for RNA homology search**. *Bioinformatics* 2011,  
1023 **27**(22):3102-3109.
- 1024 76. Huerta-Cepas J, Forslund K, Coelho LP, Szklarczyk D, Jensen LJ, von Mering C, Bork P:  
1025 **Fast Genome-Wide Functional Annotation through Orthology Assignment by**  
1026 **eggNOG-Mapper**. *Molecular Biology and Evolution* 2017, **34**(8):2115-2122.
- 1027 77. Yin Y, Mao X, Yang J, Chen X, Mao F, Xu Y: **dbCAN: a web resource for automated**  
1028 **carbohydrate-active enzyme annotation**. *Nucleic Acids Research* 2012, **40**(1):445-  
1029 451.
- 1030 78. Langmead B, Salzberg SL: **Fast gapped-read alignment with Bowtie 2**. *Nature*  
1031 *methods* 2012, **9**(4):357-359.
- 1032 79. Li H, Handsaker B, Wysoker A, Fennell T, Ruan J, Homer N, Marth G, Abecasis G,  
1033 Durbin R, Genome Project Data Processing S: **The Sequence Alignment/Map format**  
1034 **and SAMtools**. *Bioinformatics* 2009, **25**(16):2078-2079.
- 1035 80. Thompson JD, Higgins DG, Gibson TJ: **CLUSTAL W: improving the sensitivity of**  
1036 **progressive multiple sequence alignment through sequence weighting, position-**  
1037 **specific gap penalties and weight matrix choice**. *Nucleic Acids Research* 1994,  
1038 **22**(22):4673-4680.
- 1039 81. Felsenstein J: **DNADIST -- Program to compute distance matrix from nucleotide**  
1040 **sequences**. In., 3.5c edn; 1993.
- 1041 82. Price MN, Dehal PS, Arkin AP: **FastTree 2 – Approximately Maximum-Likelihood**  
1042 **Trees for Large Alignments**. *PLoS One* 2010, **5**(3):e9490.
- 1043 83. Team RC: **R: A language and environment for statistical computing**. In: *R*  
1044 *Foundation for Statistical Computing*. 3.3.2 edn; 2016.
- 1045 84. Oksanen J, Blanchet FG, Kindt R, Legendre P, O'Hara RB, Simpson GL, Solymos P,  
1046 Stevens MHH, Wagner H: **vegan: Community Ecology Package**. In., 1.17-6 edn:  
1047 <http://CRAN.R-project.org>; 2011.
- 1048 85. Legendre P, Anderson MJ: **Distance-based redundancy analysis: Testing**  
1049 **multispecies responses in multifactorial ecological experiments**. *Ecological*  
1050 *Monographs* 1999, **69**(1):1-24.
- 1051 86. Anderson MJ: **A new method for non-parametric multivariate analysis of variance**.  
1052 *Austral Ecology* 2001, **26**(1):32-46.
- 1053 87. Hothorn T, Hornik K, Van de Wiel MA, Zeileis A: **A Lego system for conditional**  
1054 **inference**. *American Statistician* 2006, **60**(3):257-263.
- 1055 88. Kembel SW, Cowan PD, Helmus MR, Cornwell WK, Morlon H, Ackerly DD, Blomberg  
1056 SP, Webb CO: **Picante: R tools for integrating phylogenies and ecology**.  
1057 *Bioinformatics* 2010, **26**(11):1463-1464.
- 1058 89. Paradis E, Claude J, Strimmer K: **APE: analyses of phylogenetics and evolution in R**  
1059 **language**. *Bioinformatics* 2004, **20**(2):289-290.
- 1060 90. Pinheiro J, Bates D, DebRoy S, Sarkar D, Team RDC: **nlme: Linear and Nonlinear**  
1061 **Mixed Effects Models**. In.: <http://CRAN.R-project.org>; 2011.
- 1062 91. Hommel G: **A stagewise rejective multiple test procedure based on a modified**  
1063 **Bonferroni test**. *Biometrika* 1988, **75**(2):383-386.
- 1064 92. Benjamini Y, Yekutieli D: **The control of the false discovery rate in multiple testing**  
1065 **under dependency**. *Annals of Statistics* 2001, **29**(4):1165-1188.
- 1066 93. Wang J, Thingholm LB, Skieceviciene J, Rausch P, Kummén M, Hov JR, Degenhardt F,  
1067 Heinsen F-A, Ruhlemann MC, Szymczak S *et al*: **Genome-wide association analysis**  
1068 **identifies variation in vitamin D receptor and other host factors influencing the gut**  
1069 **microbiota**. *Nat Genet* 2016, **48**(11):1396-1406.

1070 94. Rausch P, Rehman A, Künzel S, Häsler R, Ott SJ, Schreiber S, Rosenstiel P, Franke A,  
1071 Baines JF: **Colonic mucosa-associated microbiota is influenced by an interaction**  
1072 **of Crohn disease and FUT2 (Secretor) genotype.** *Proceedings of the National*  
1073 *Academy of Sciences* 2011, **108**(47):19030-19035.

1074

**Bacteria:**

- Bacillus
- Salmonella
- Staphylococcus
- Lactobacillus
- Listeria
- Pseudomonas
- Enterococcus
- Escherichia
- Escherichia.Shigella
- Enterobacteriaceae
- Shigella
- Others

**Genus distribution**

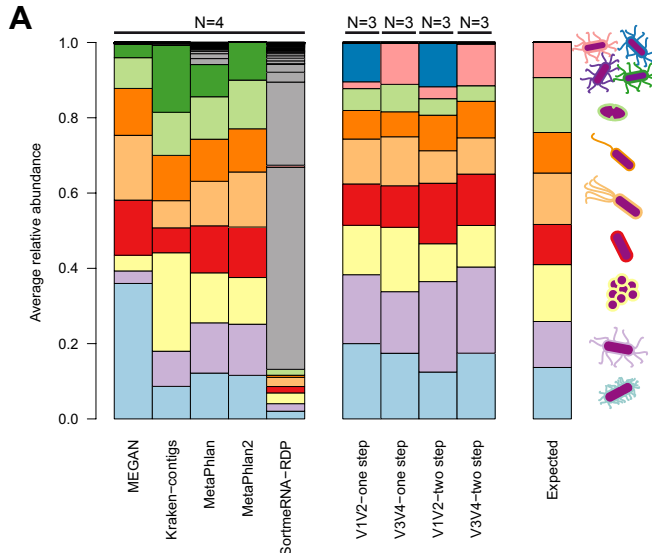

**Fungi:**

- Saccharomyces
- Cryptococcus
- Filobasidiella
- Debaryomycetaceae\_unclassified
- Naumovozyma
- Eremothecium
- Kwnoniella
- Eutypa

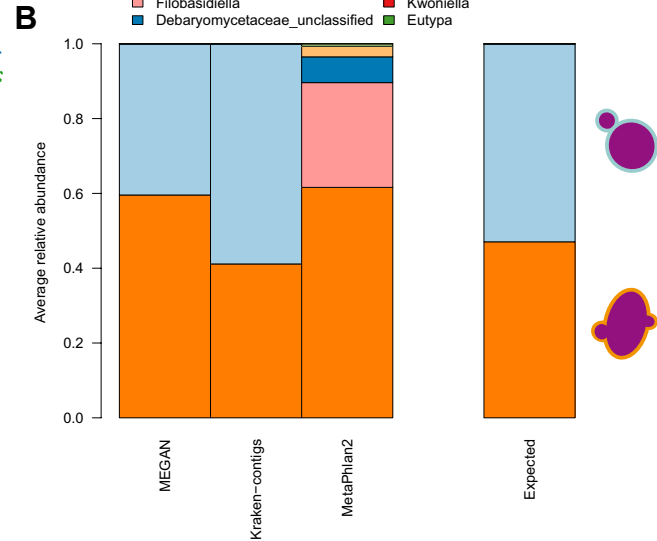

**C Community diversity**

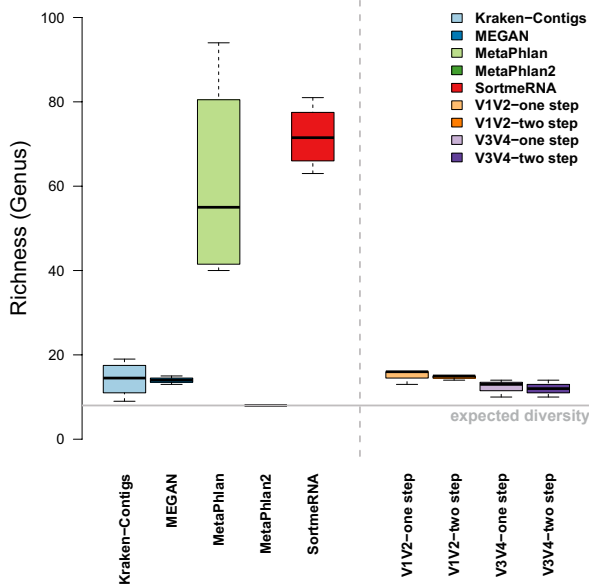

**D Distance to expected composition**

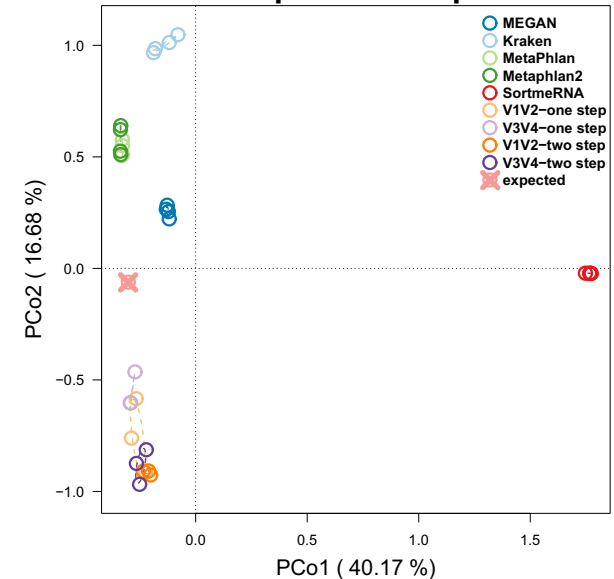

○ V1V2-one step ○ V1V2-two step △ V3V4-one step △ V3V4-two step □ MEGAN

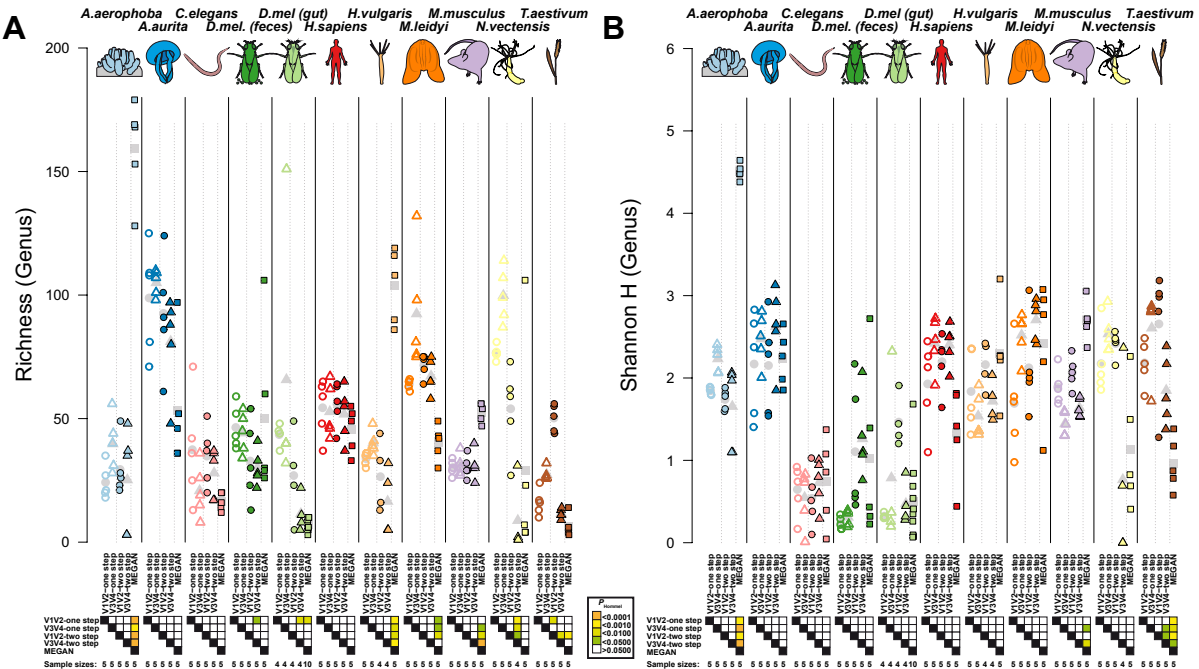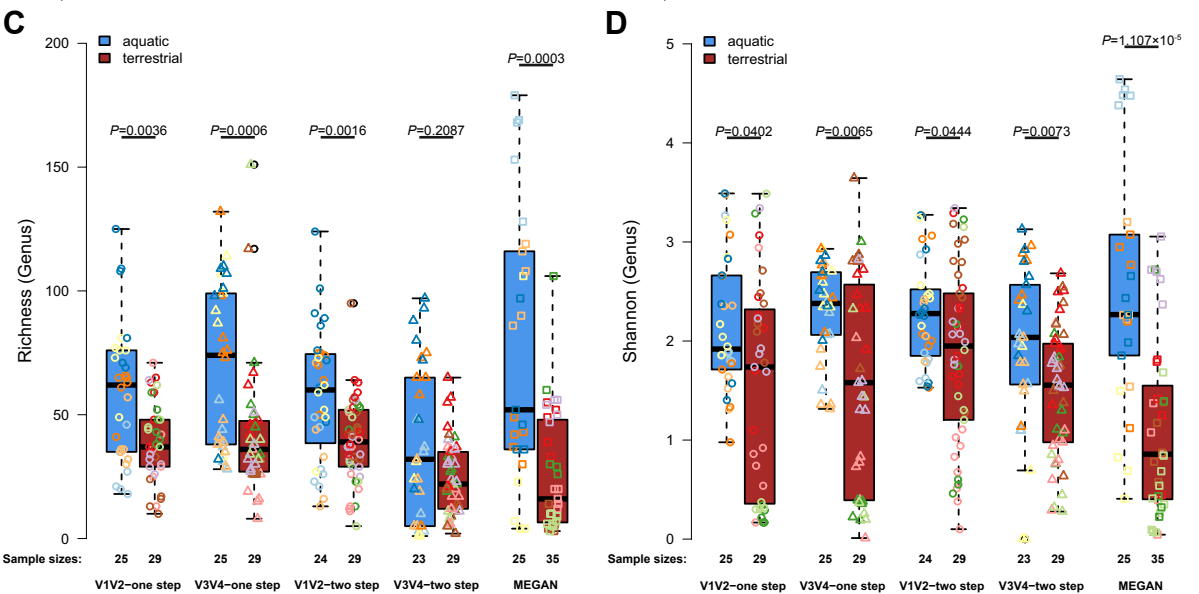

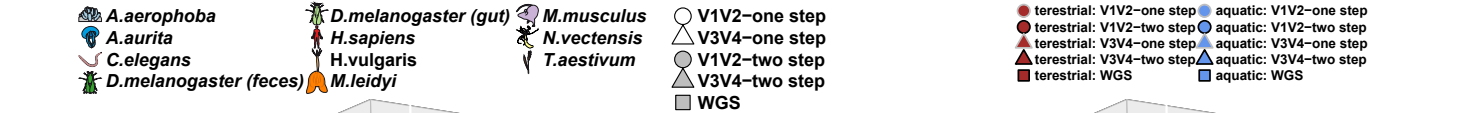

Bray-Curtis distance

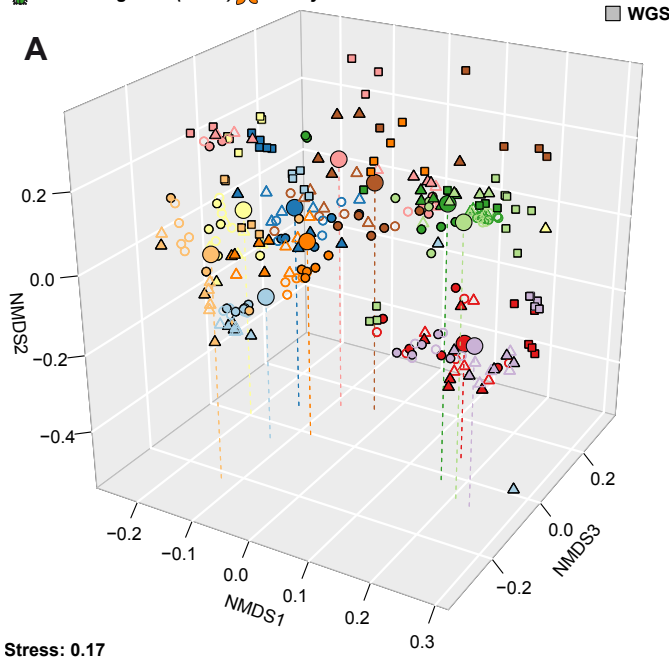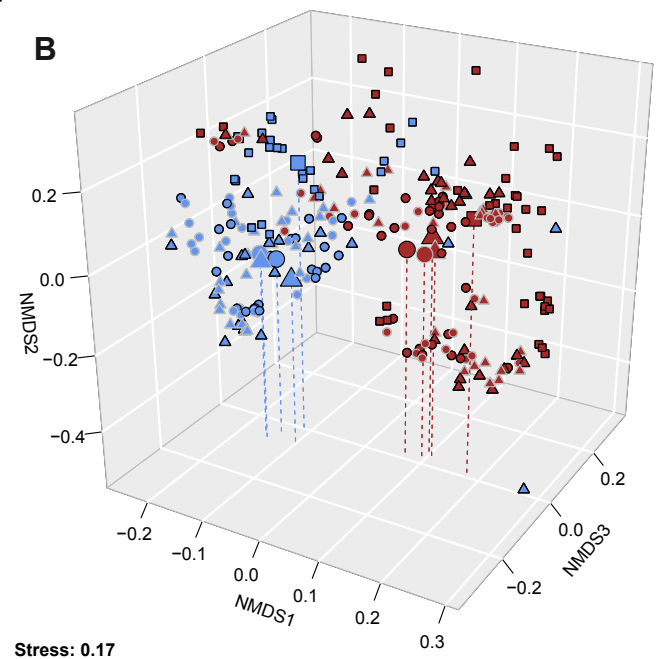

Jaccard distance

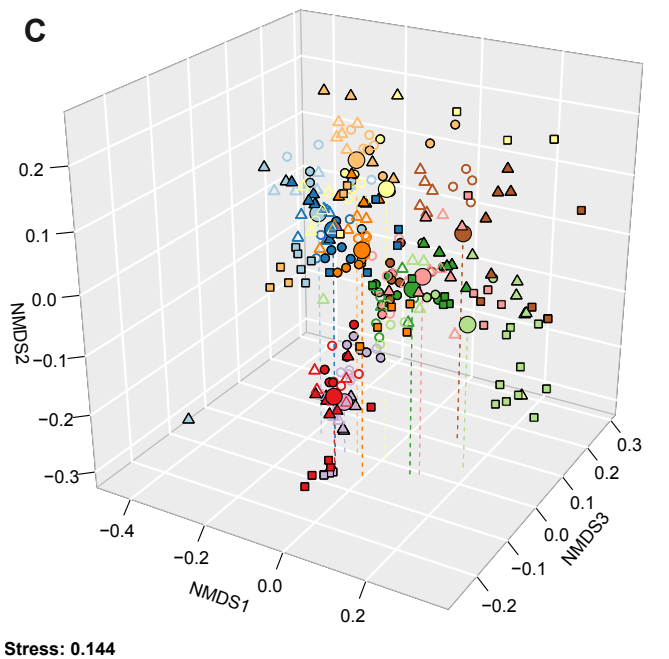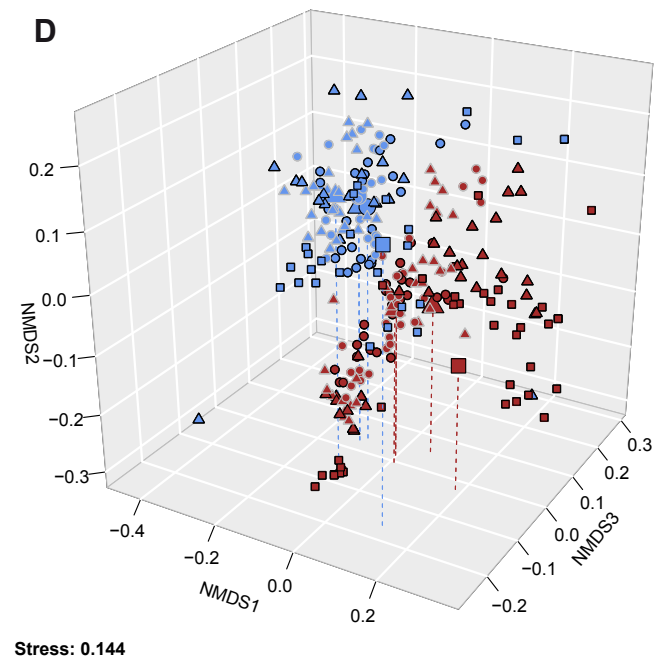



## Bray-Curtis

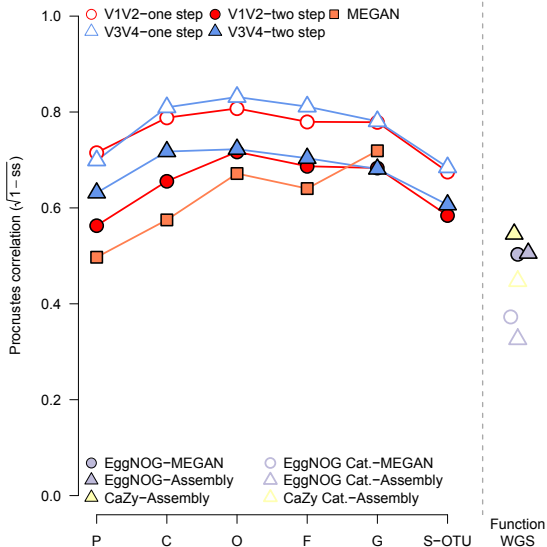

## Jaccard

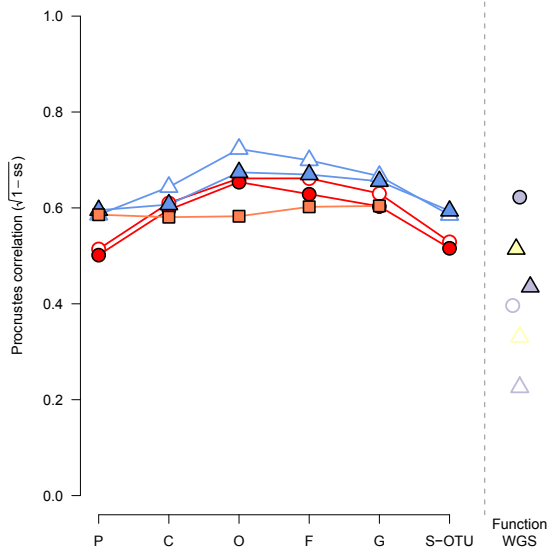

**A**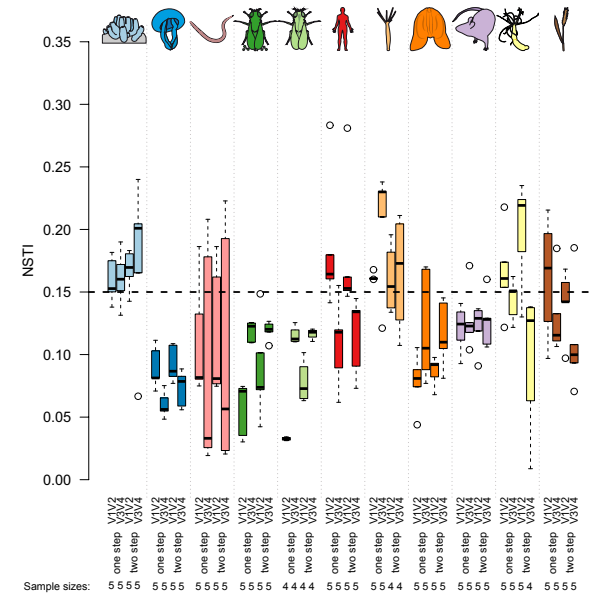**B**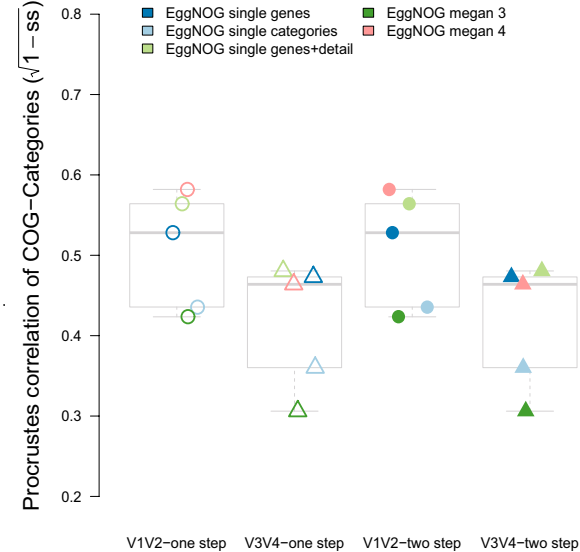**C**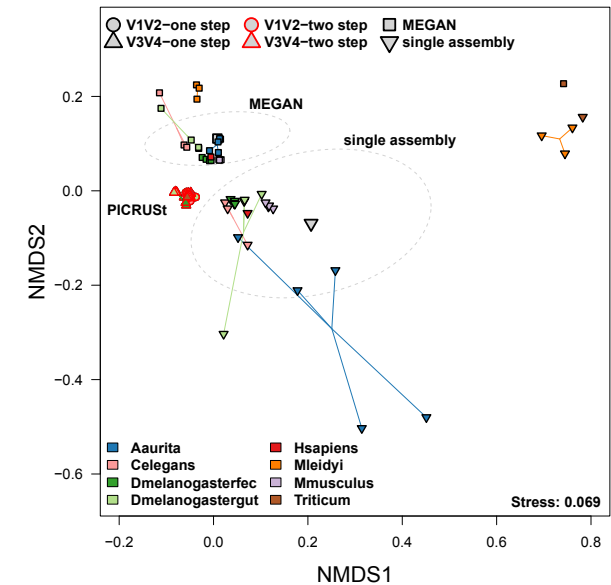

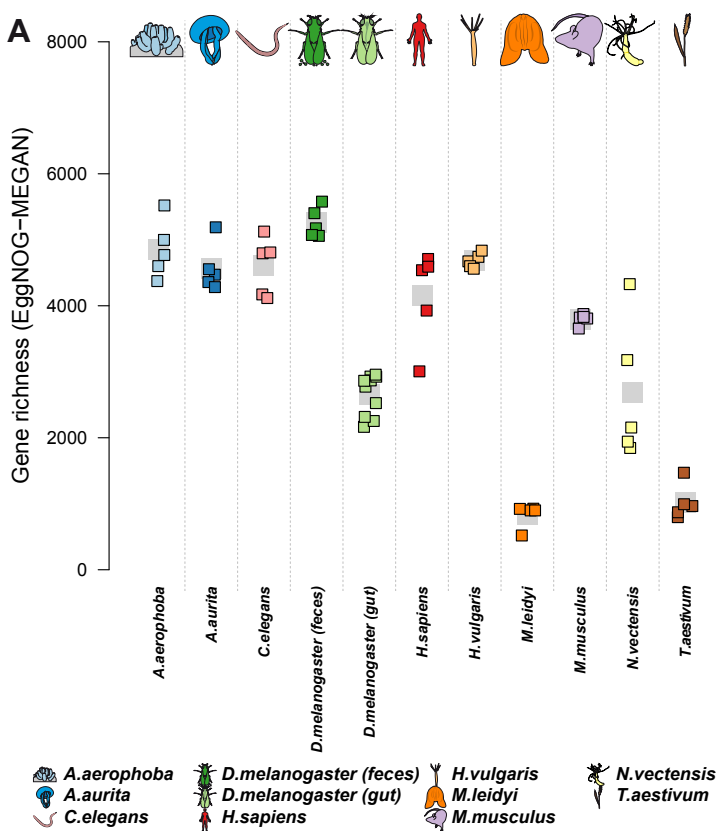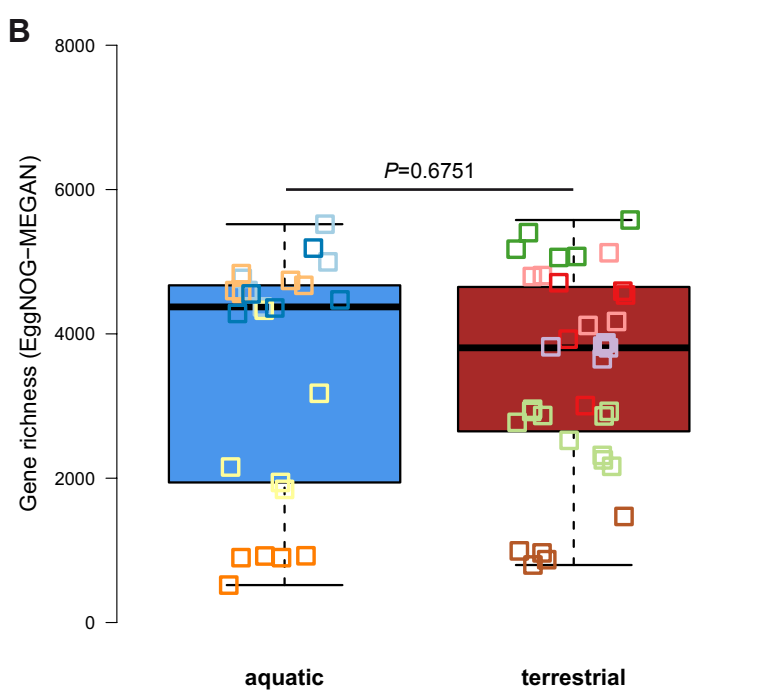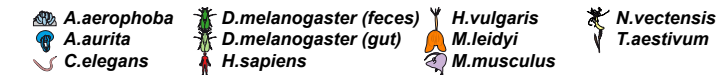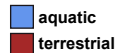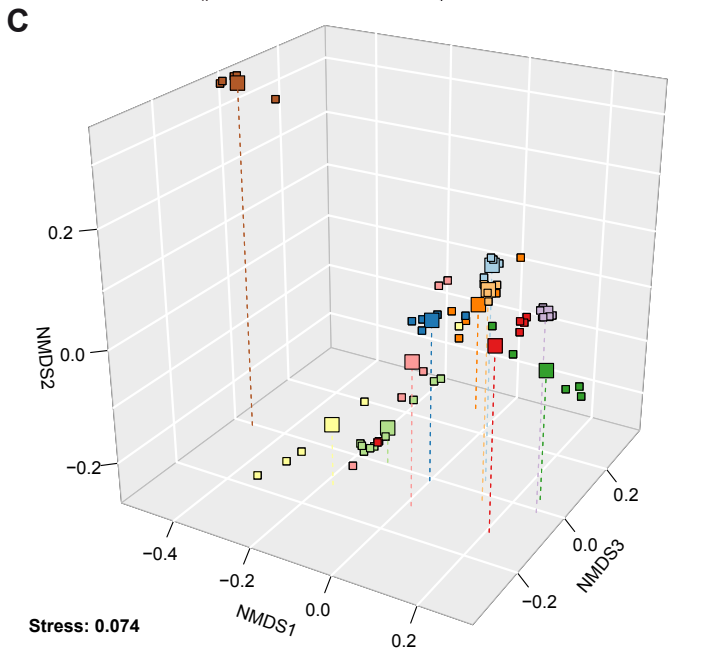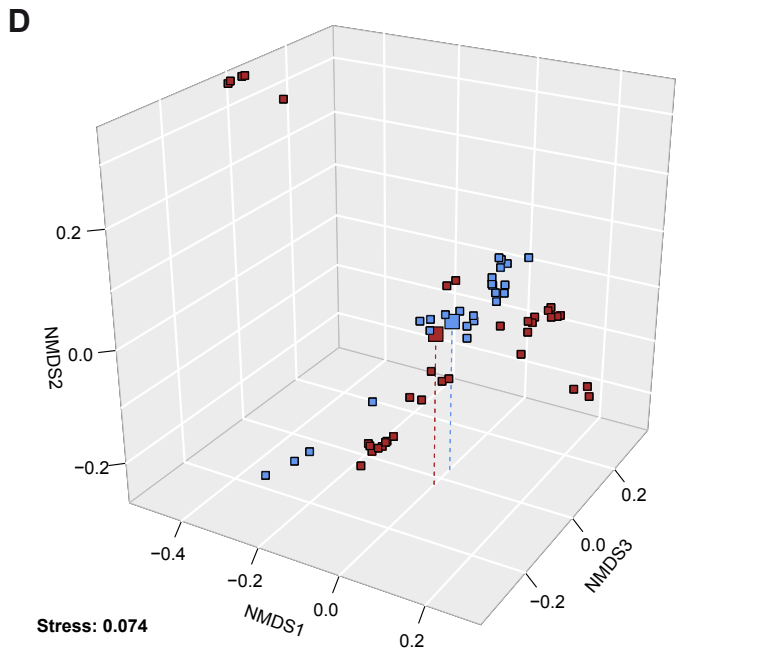

Source: https://www.biorxiv.org/content/10.1101/604314v1.full.pdf
